# Supplementary material
Source: publisher figshare collection journal article supplement (https://acs.figshare.com/ndownloader/files/3725782)

# Supporting Information

## 2-Oxindole Act as a Synthone of 2-Aminobenzoyl Anion in the K<sub>2</sub>CO<sub>3</sub>-Catalyzed Reaction with Enones: Preparation of 1,4-Diketones Bearing an Amino Group and Their Further Transformations

Chun-Bao Miao,\* Yu-Mei Zeng, Tong Shi, Rui Liu, Peng-Fei Wei, Xiao-Qiang Sun, Hai-Tao Yang

Jiangsu Key Laboratory of Advanced Catalytic Materials and Technology, Advanced Catalysis and Green  
Manufacturing Collaborative Innovation Center, School of Petrochemical Engineering, Changzhou University,  
Changzhou 213164, China.

Email: estally@yahoo.com

|                                                                                    |       |
|------------------------------------------------------------------------------------|-------|
| Single Crystal Structure of Compounds <b>3a</b> , <b>4al</b> , and <b>12</b> ..... | S3–5  |
| <sup>1</sup> H NMR, <sup>13</sup> C NMR Spectra of the Compounds .....             | S6–41 |
| <sup>1</sup> H NMR and <sup>13</sup> C NMR spectra of <b>3a</b> .....              | S6    |
| <sup>1</sup> H NMR spectra of the mixture of <b>3a</b> and <b>3b</b> .....         | S7    |
| <sup>1</sup> H NMR and <sup>13</sup> C NMR spectra of <b>4aa</b> .....             | S8    |
| <sup>1</sup> H NMR and <sup>13</sup> C NMR spectra of <b>4ab</b> .....             | S9    |
| <sup>1</sup> H NMR and <sup>13</sup> C NMR spectra of <b>4ac</b> .....             | S10   |
| <sup>1</sup> H NMR and <sup>13</sup> C NMR spectra of <b>4ad</b> .....             | S11   |
| <sup>1</sup> H NMR and <sup>13</sup> C NMR spectra of <b>4ae</b> .....             | S12   |
| <sup>1</sup> H NMR and <sup>13</sup> C NMR spectra of <b>4af</b> .....             | S13   |
| <sup>1</sup> H NMR and <sup>13</sup> C NMR spectra of <b>4ag</b> .....             | S14   |
| <sup>1</sup> H NMR and <sup>13</sup> C NMR spectra of <b>4ah</b> .....             | S15   |
| <sup>1</sup> H NMR and <sup>13</sup> C NMR spectra of <b>4ai</b> .....             | S16   |
| <sup>1</sup> H NMR and <sup>13</sup> C NMR spectra of <b>4aj</b> .....             | S17   |
| <sup>1</sup> H NMR and <sup>13</sup> C NMR spectra of <b>4ak</b> .....             | S18   |
| <sup>1</sup> H NMR and <sup>13</sup> C NMR spectra of <b>4al</b> .....             | S19   |
| <sup>1</sup> H NMR and <sup>13</sup> C NMR spectra of <b>4am</b> .....             | S20   |
| <sup>1</sup> H NMR and <sup>13</sup> C NMR spectra of <b>4an</b> .....             | S21   |
| <sup>1</sup> H NMR and <sup>13</sup> C NMR spectra of <b>4ao</b> .....             | S22   |
| <sup>1</sup> H NMR and <sup>13</sup> C NMR spectra of <b>4ap</b> .....             | S23   |
| <sup>1</sup> H NMR and <sup>13</sup> C NMR spectra of <b>4aq</b> .....             | S24   |
| <sup>1</sup> H NMR and <sup>13</sup> C NMR spectra of <b>4ar</b> .....             | S25   |

|                                                                        |     |
|------------------------------------------------------------------------|-----|
| <sup>1</sup> H NMR and <sup>13</sup> C NMR spectra of <b>4as</b> ..... | S26 |
| <sup>1</sup> H NMR and <sup>13</sup> C NMR spectra of <b>4at</b> ..... | S27 |
| <sup>1</sup> H NMR and <sup>13</sup> C NMR spectra of <b>4ba</b> ..... | S28 |
| <sup>1</sup> H NMR and <sup>13</sup> C NMR spectra of <b>4ca</b> ..... | S29 |
| <sup>1</sup> H NMR and <sup>13</sup> C NMR spectra of <b>4da</b> ..... | S30 |
| <sup>1</sup> H NMR and <sup>13</sup> C NMR spectra of <b>4ea</b> ..... | S31 |
| <sup>1</sup> H NMR and <sup>13</sup> C NMR spectra of <b>4fa</b> ..... | S32 |
| <sup>1</sup> H NMR and <sup>13</sup> C NMR spectra of <b>4ga</b> ..... | S33 |
| <sup>1</sup> H NMR and <sup>13</sup> C NMR spectra of <b>5</b> .....   | S34 |
| <sup>1</sup> H NMR and <sup>13</sup> C NMR spectra of <b>6</b> .....   | S35 |
| <sup>1</sup> H NMR and <sup>13</sup> C NMR spectra of <b>9</b> .....   | S36 |
| <sup>1</sup> H NMR and <sup>13</sup> C NMR spectra of <b>10</b> .....  | S37 |
| <sup>1</sup> H NMR and <sup>13</sup> C NMR spectra of <b>11</b> .....  | S38 |
| <sup>1</sup> H NMR and <sup>13</sup> C NMR spectra of <b>12</b> .....  | S39 |
| <sup>1</sup> H NMR and <sup>13</sup> C NMR spectra of <b>13</b> .....  | S40 |
| <sup>1</sup> H NMR and <sup>13</sup> C NMR spectra of <b>14</b> .....  | S41 |

The single crystals of compounds **3a**, **4a**, and **12** were obtained by slowly evaporating the solvent from the solution in mixed solvent of ethyl acetate/petroleum ether. Their molecular structure were drawn with 30% probability displacement ellipsoids.

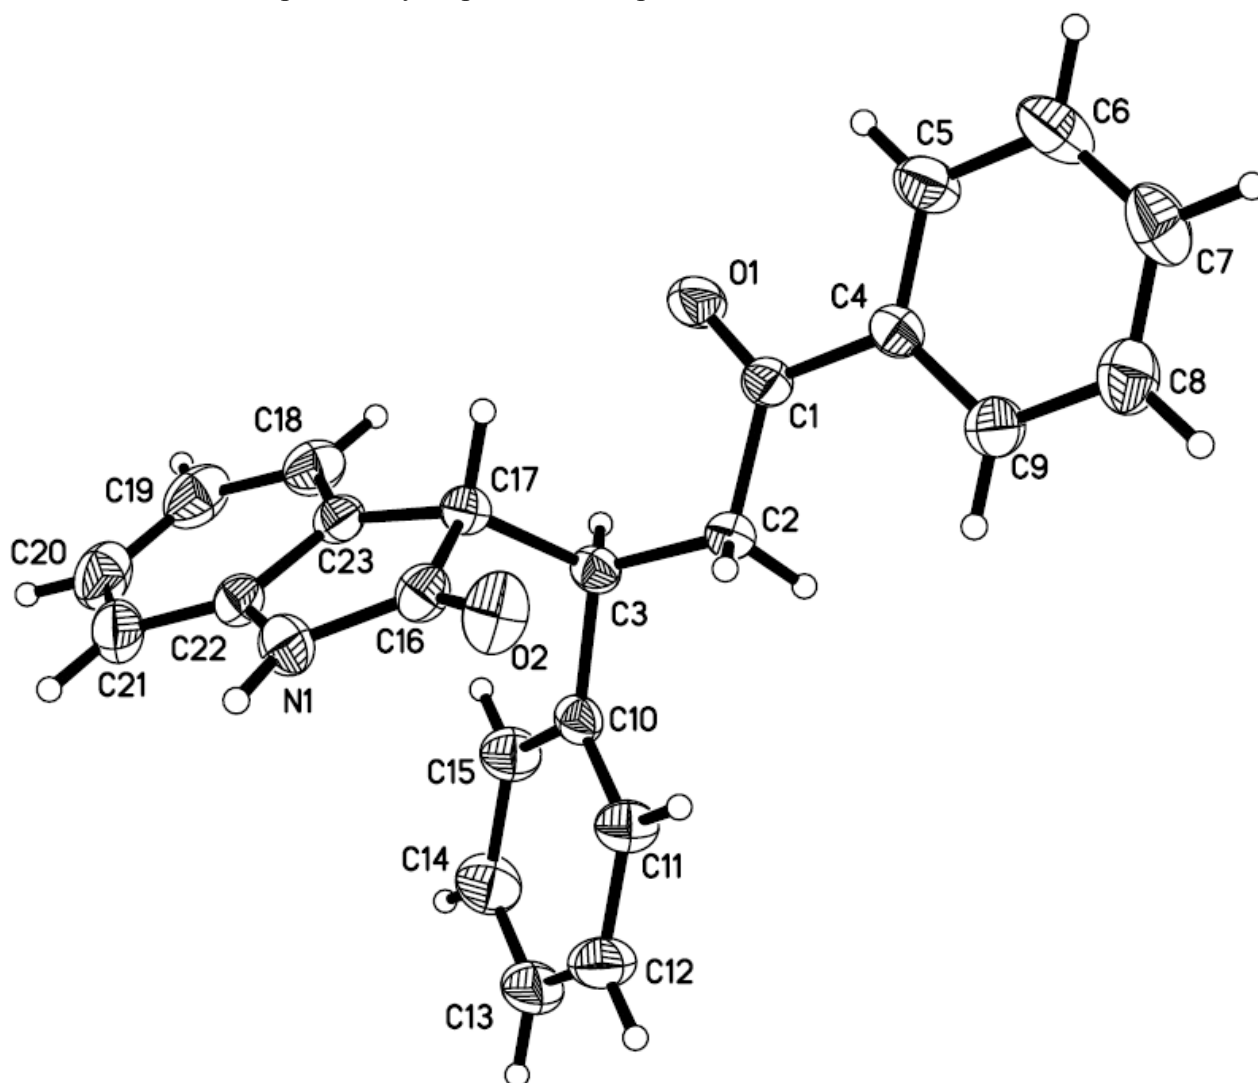

**3a** (CCDC: 1406800)

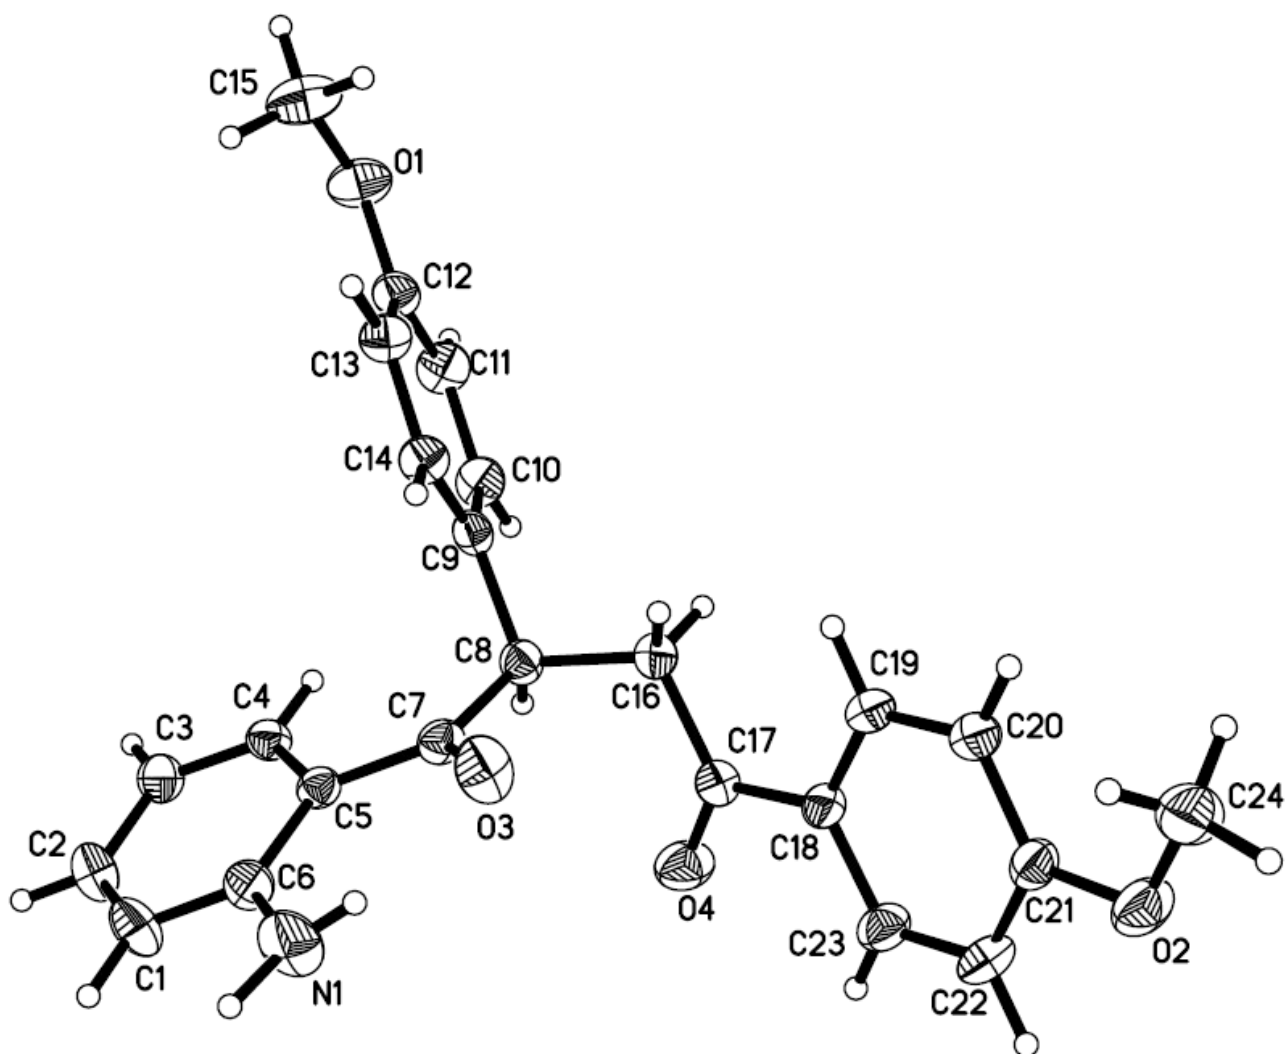

**4al** (CCDC: 1406801)

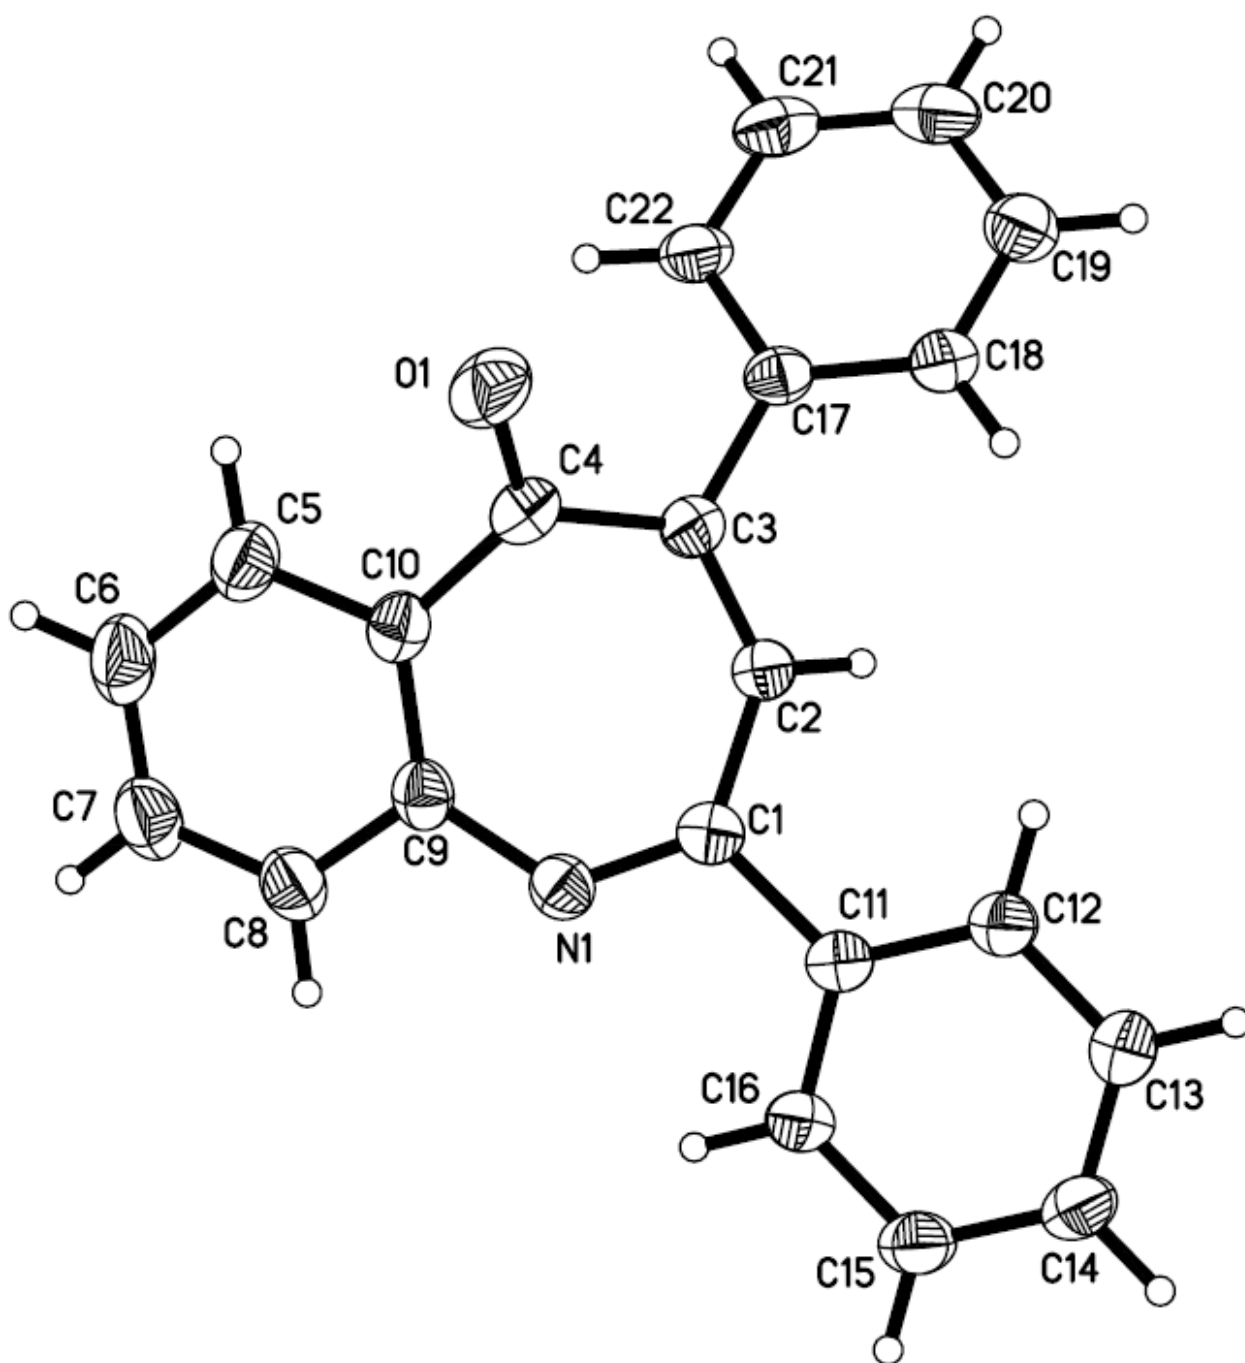

12 (CCDC: 1406802)

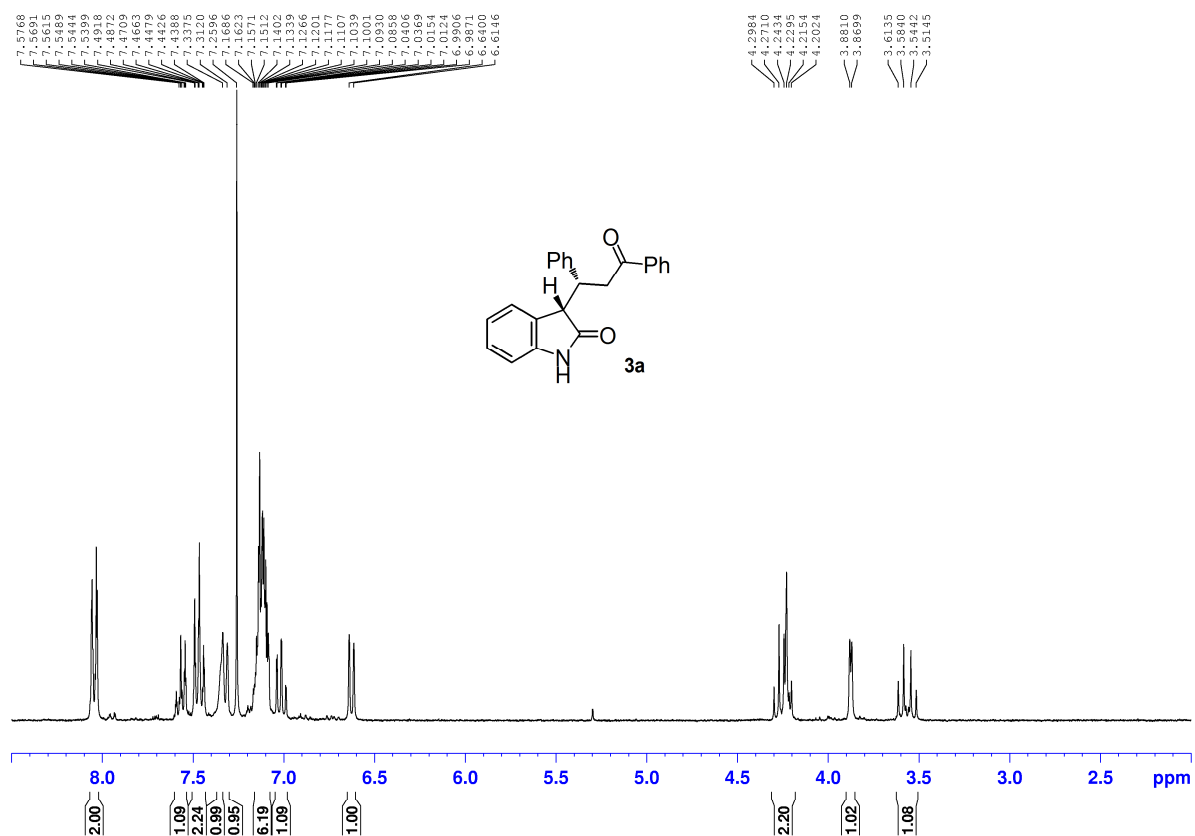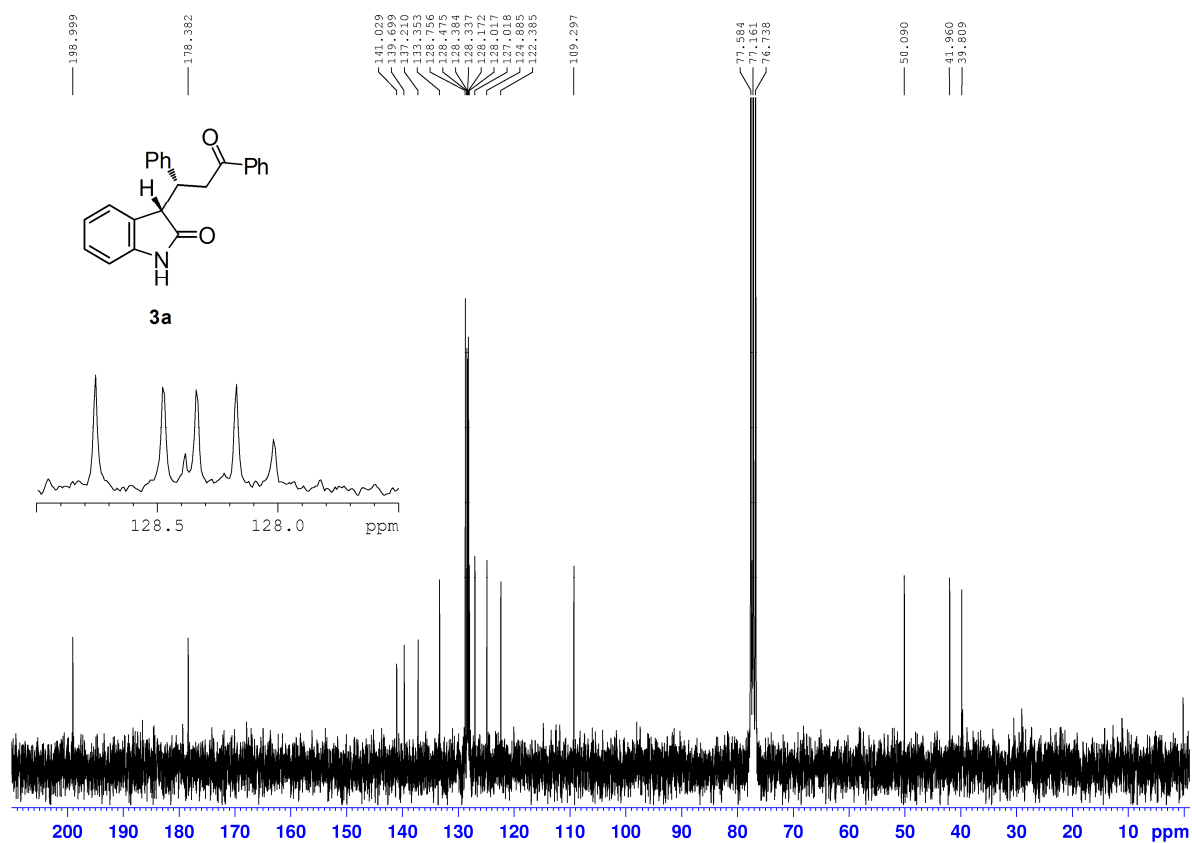

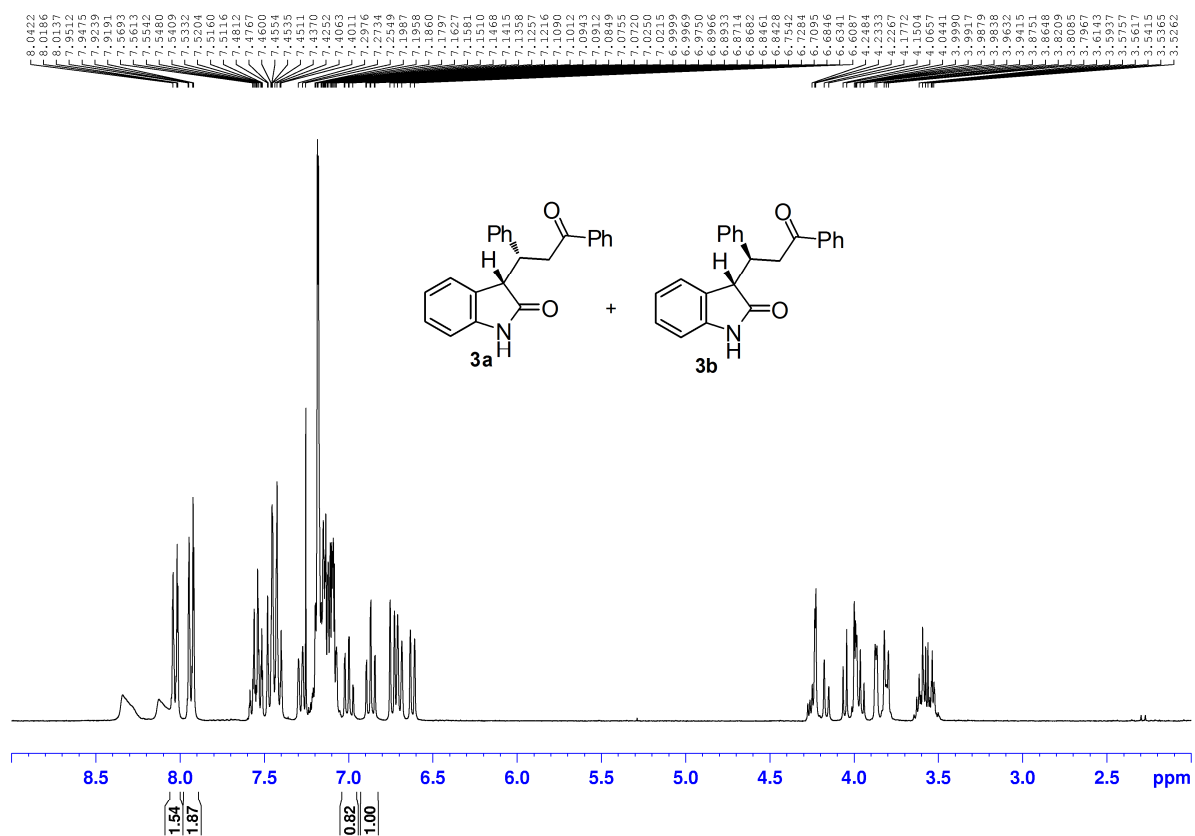

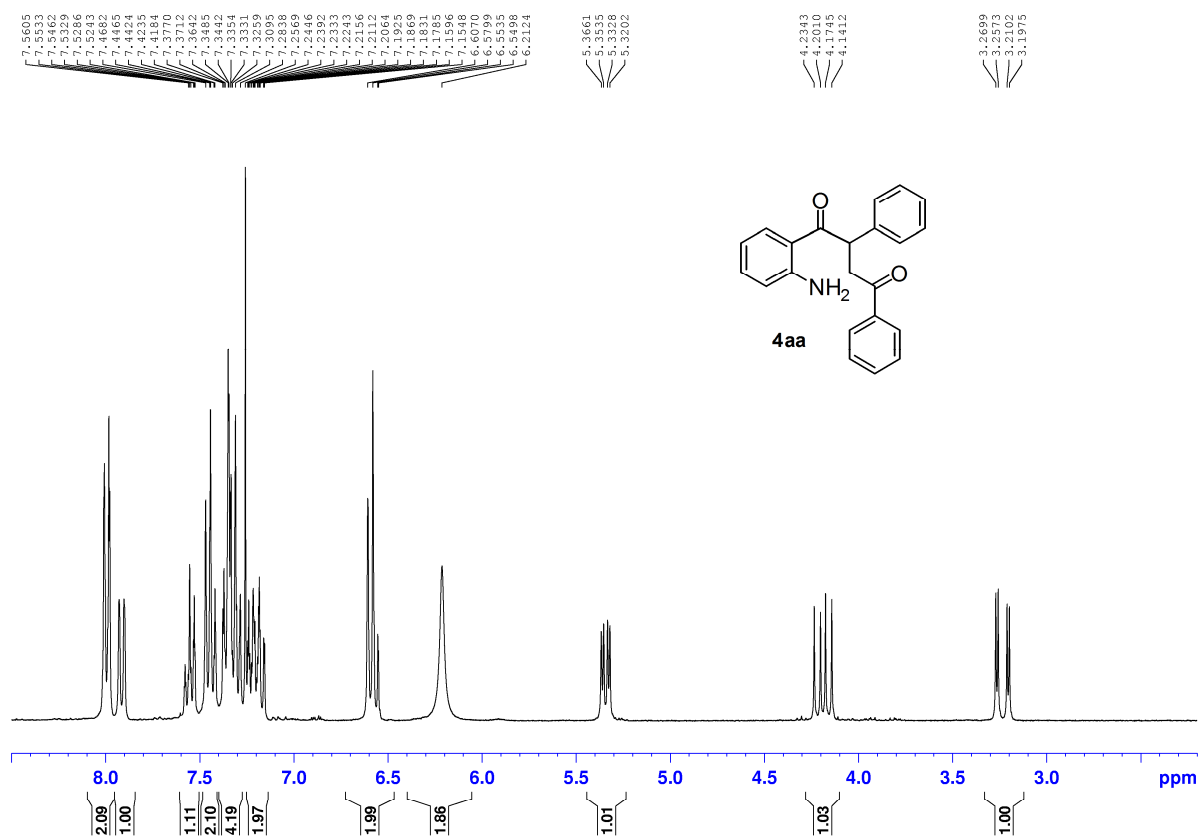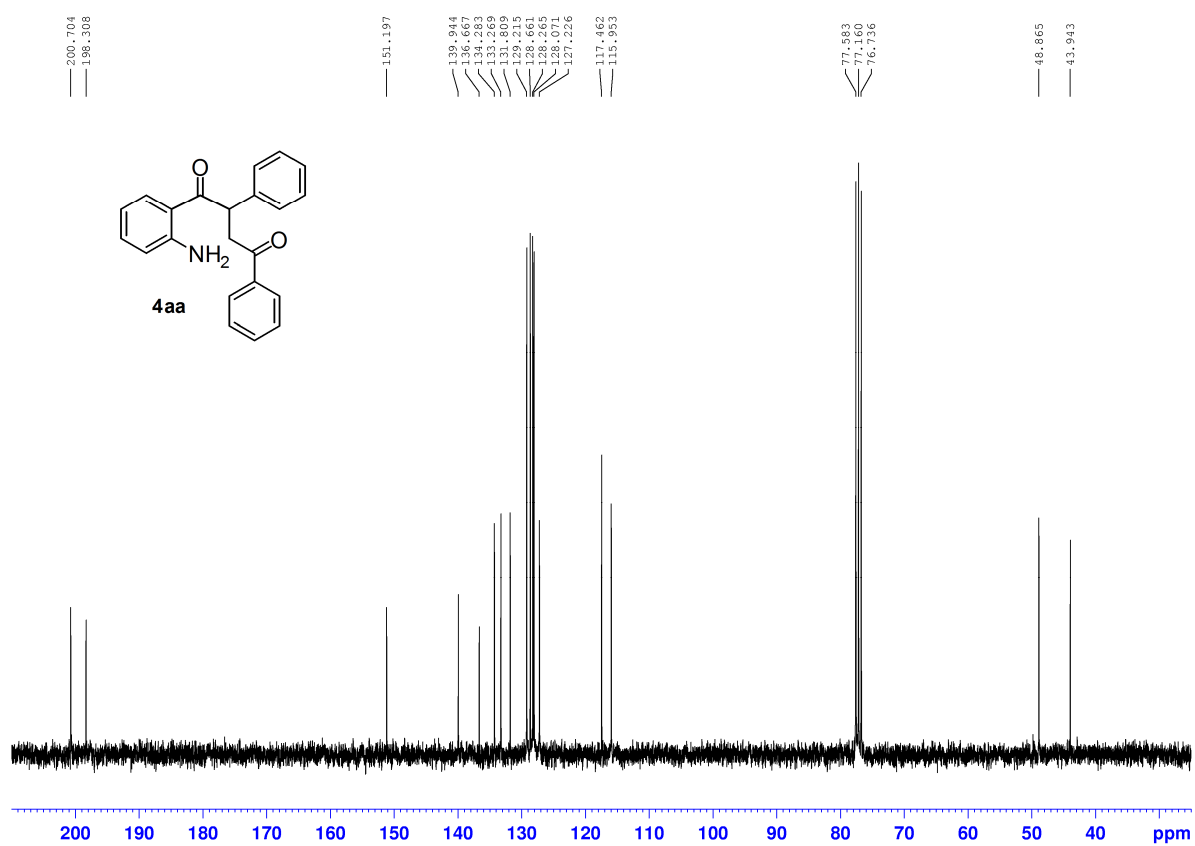



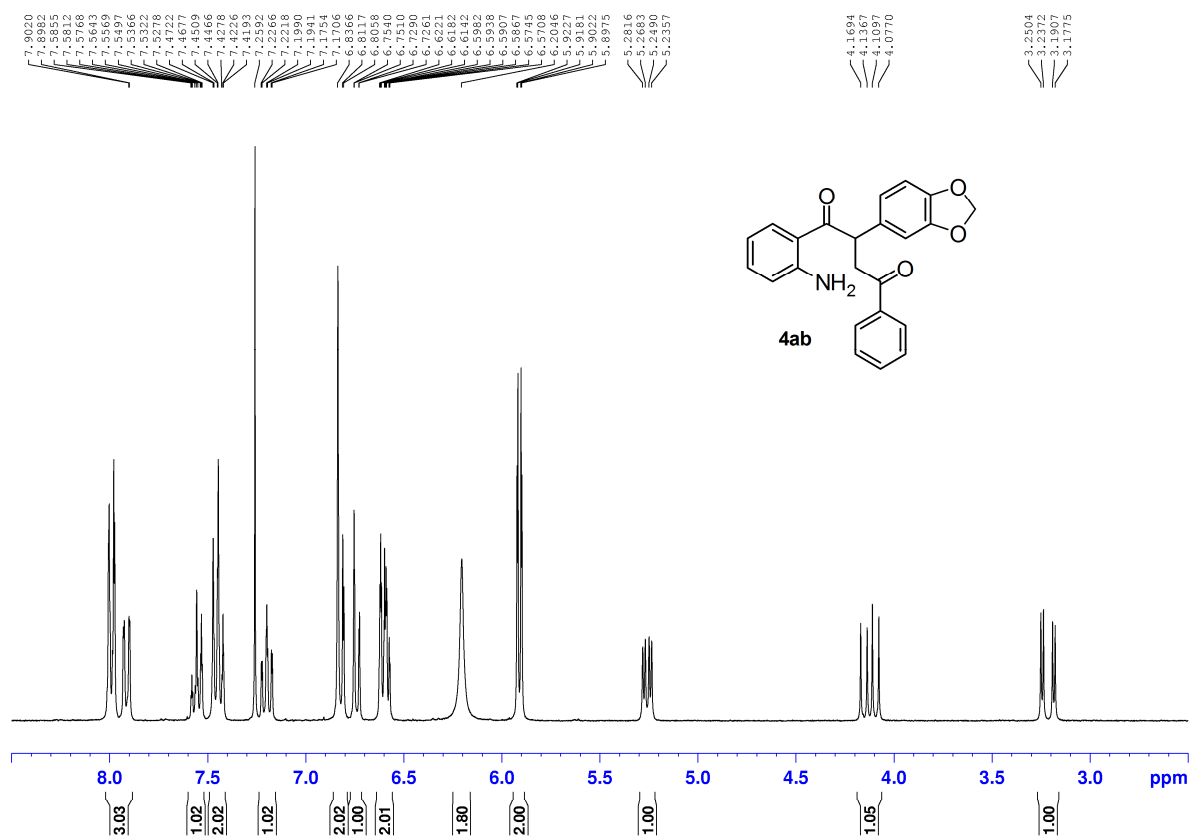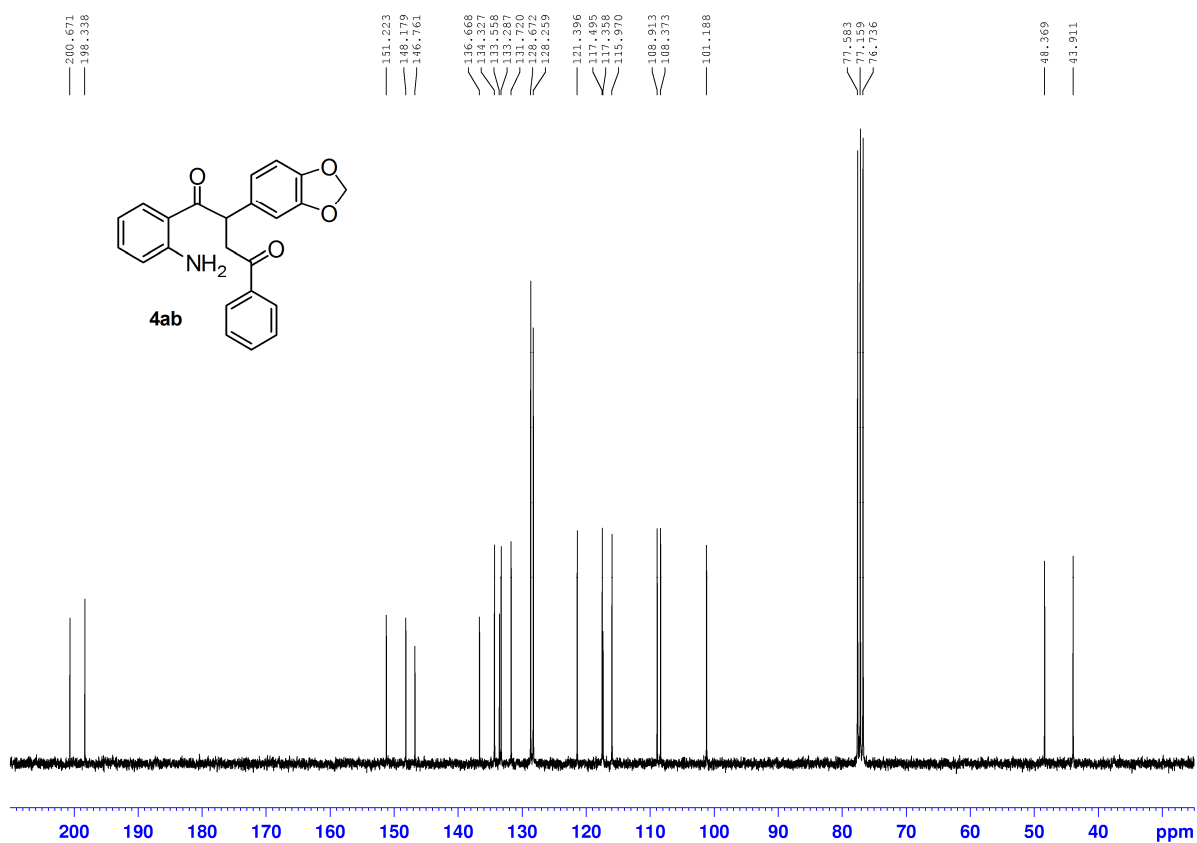

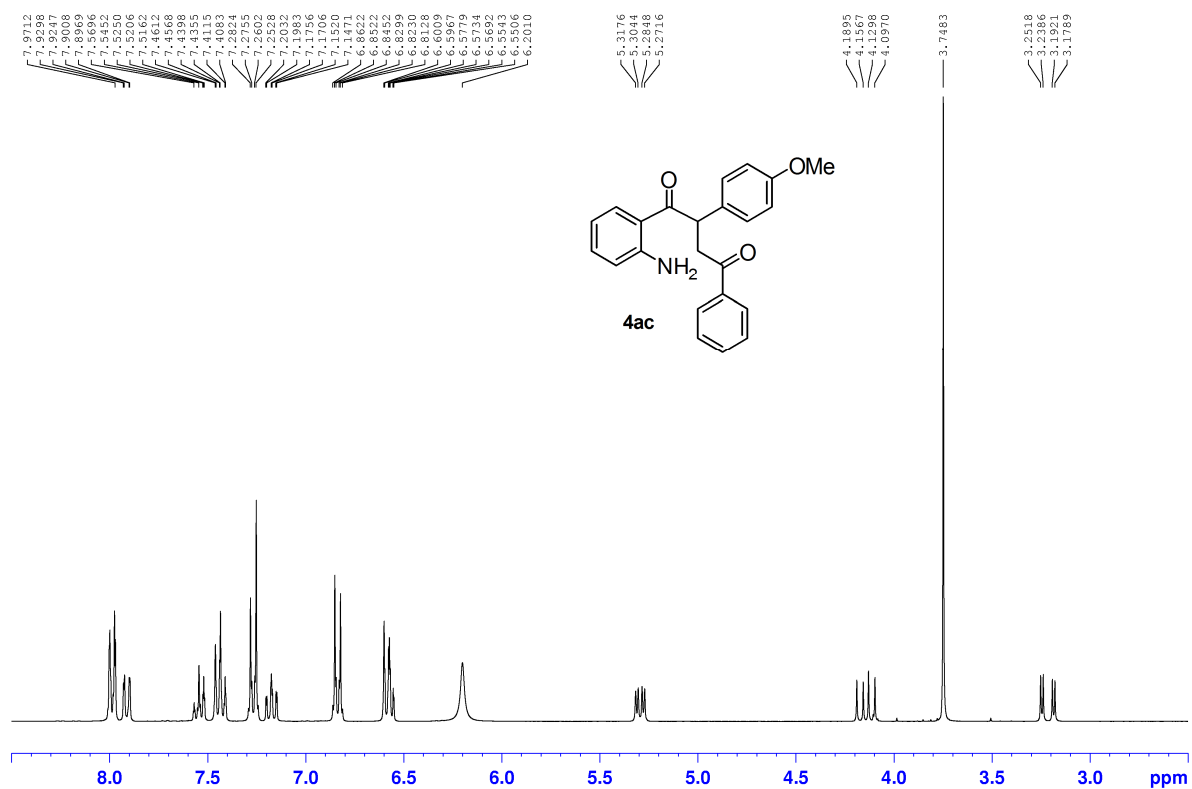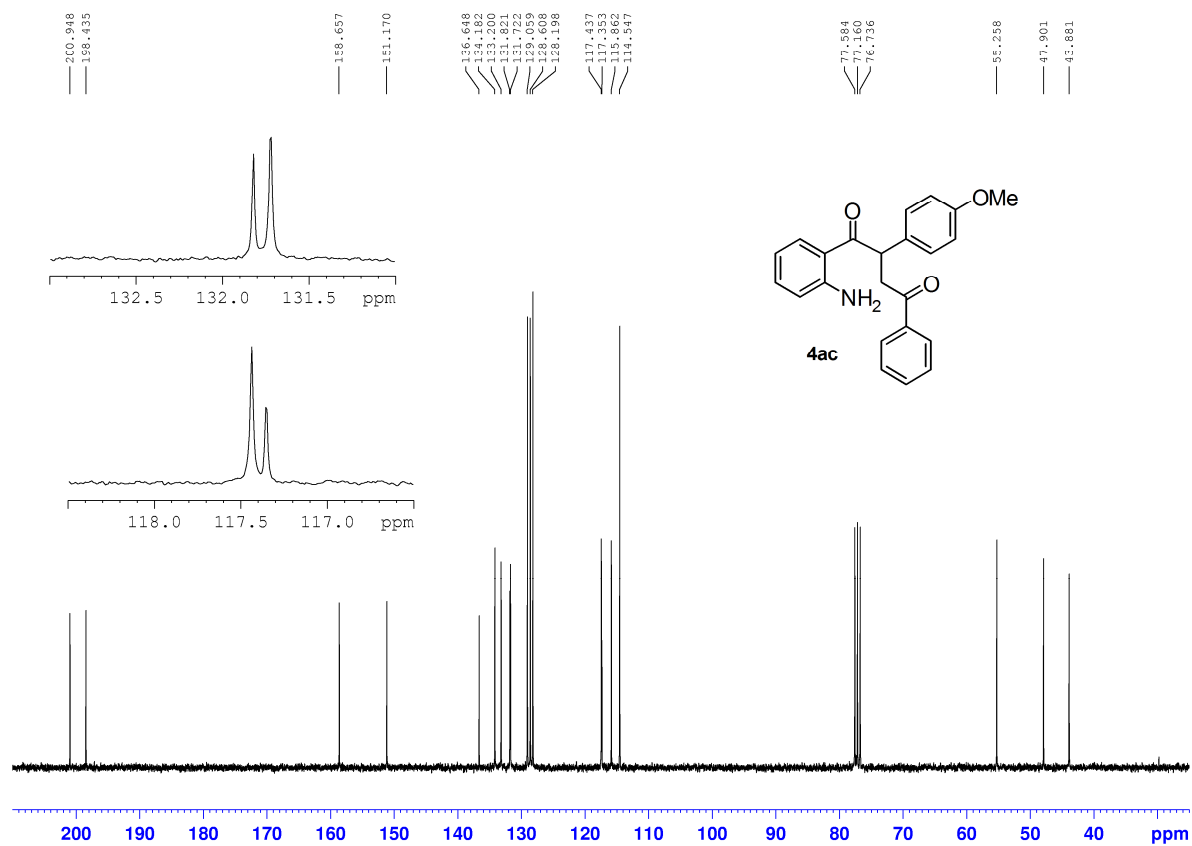

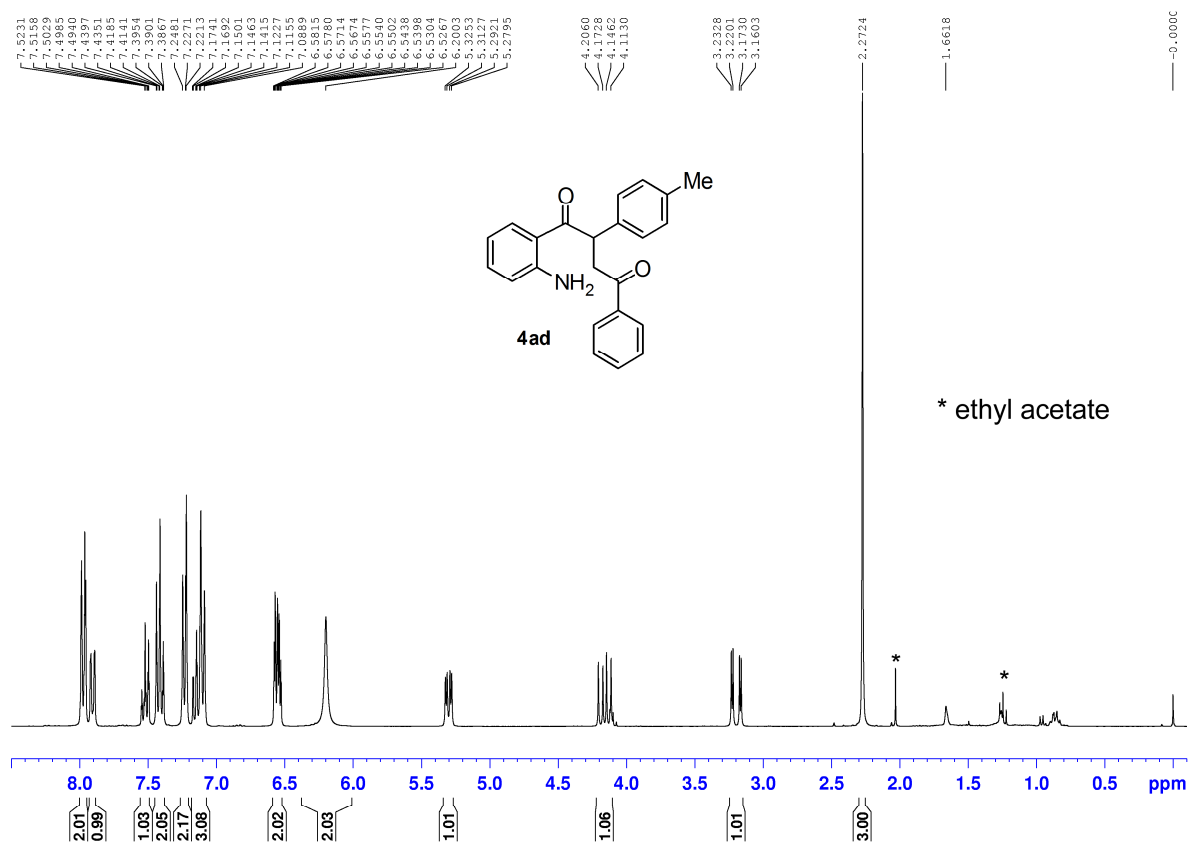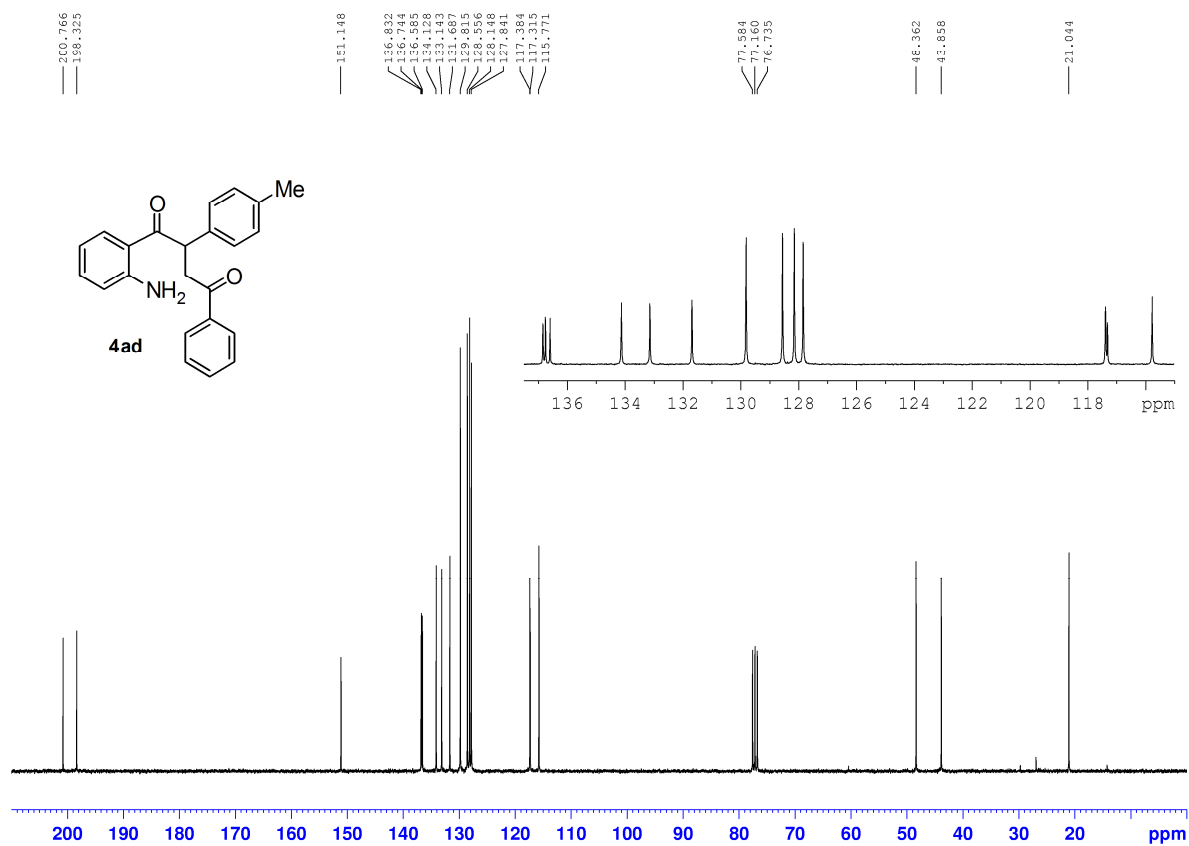

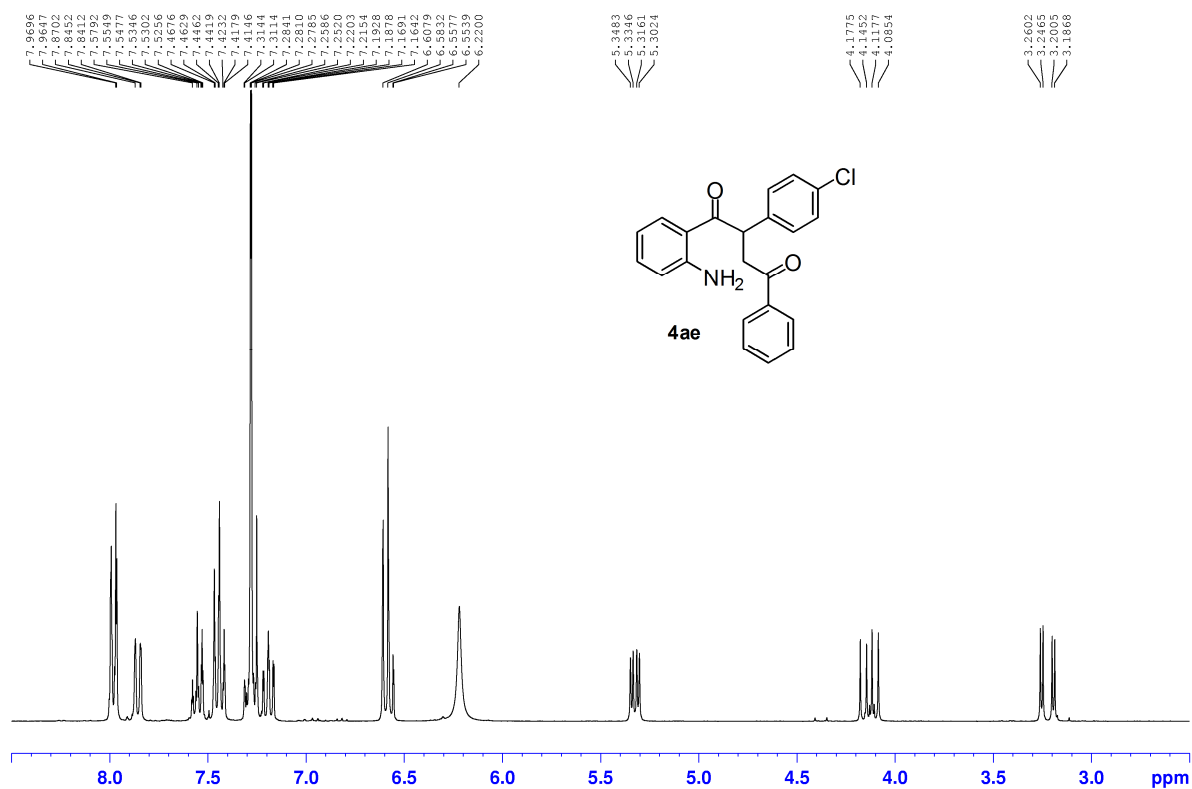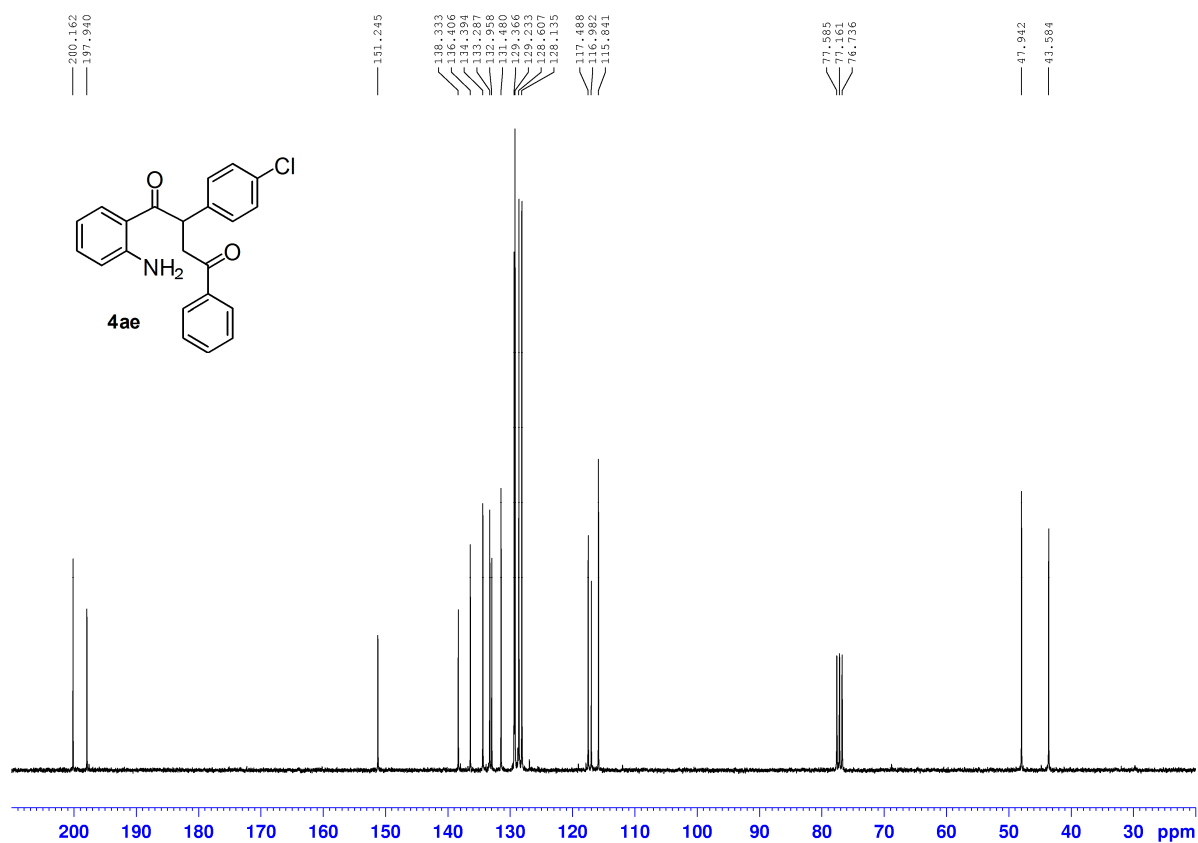



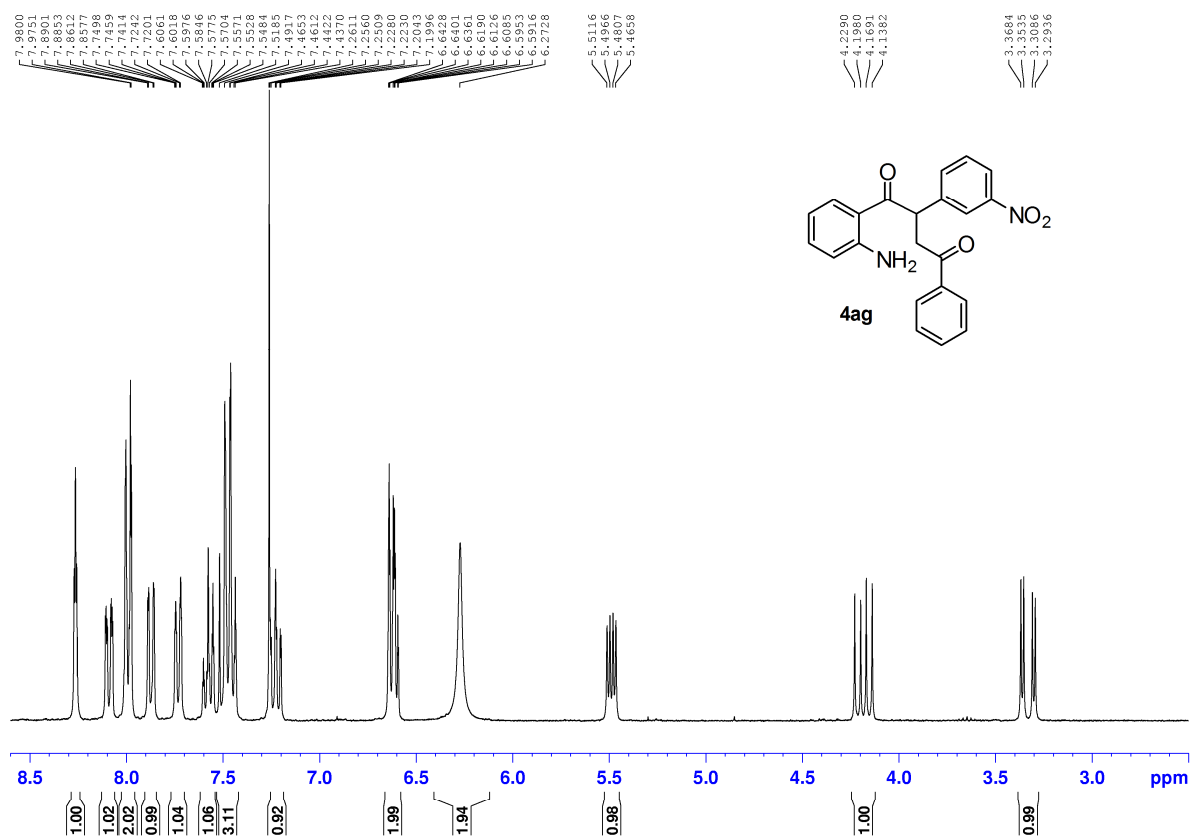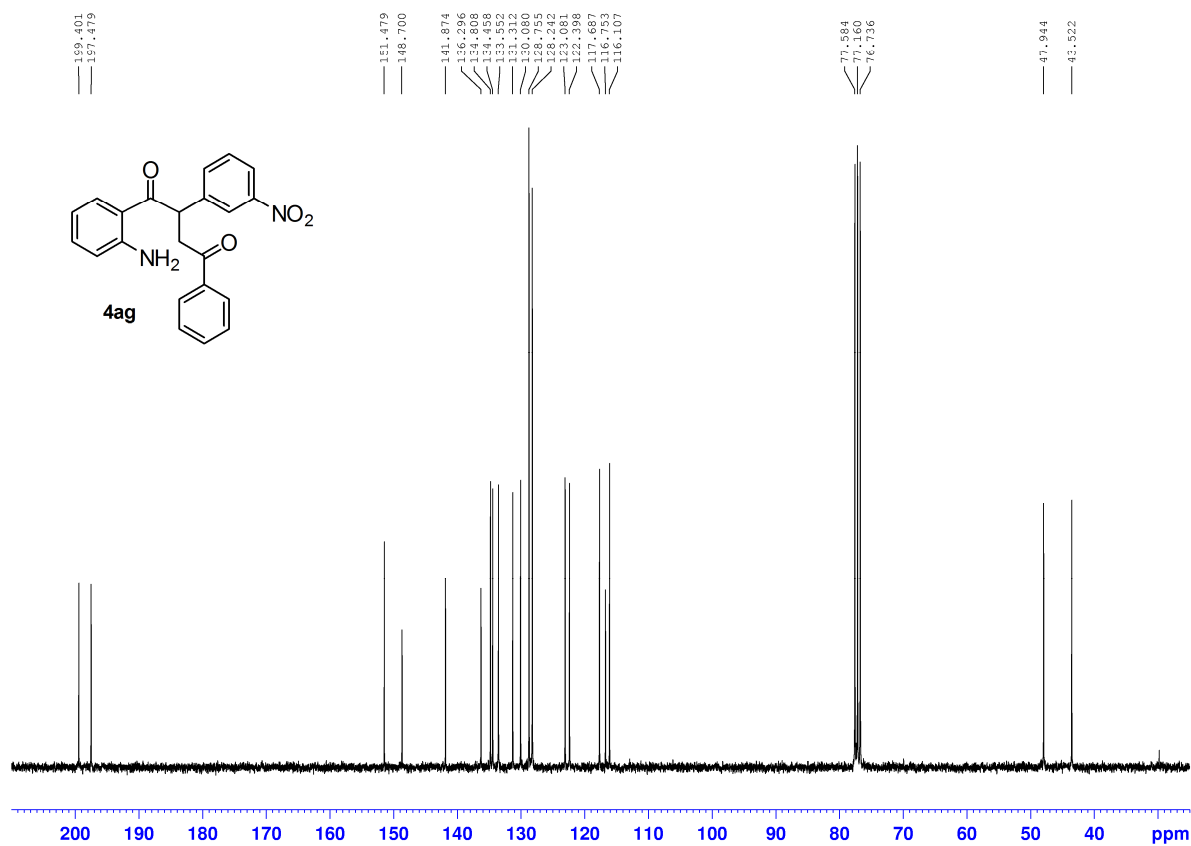

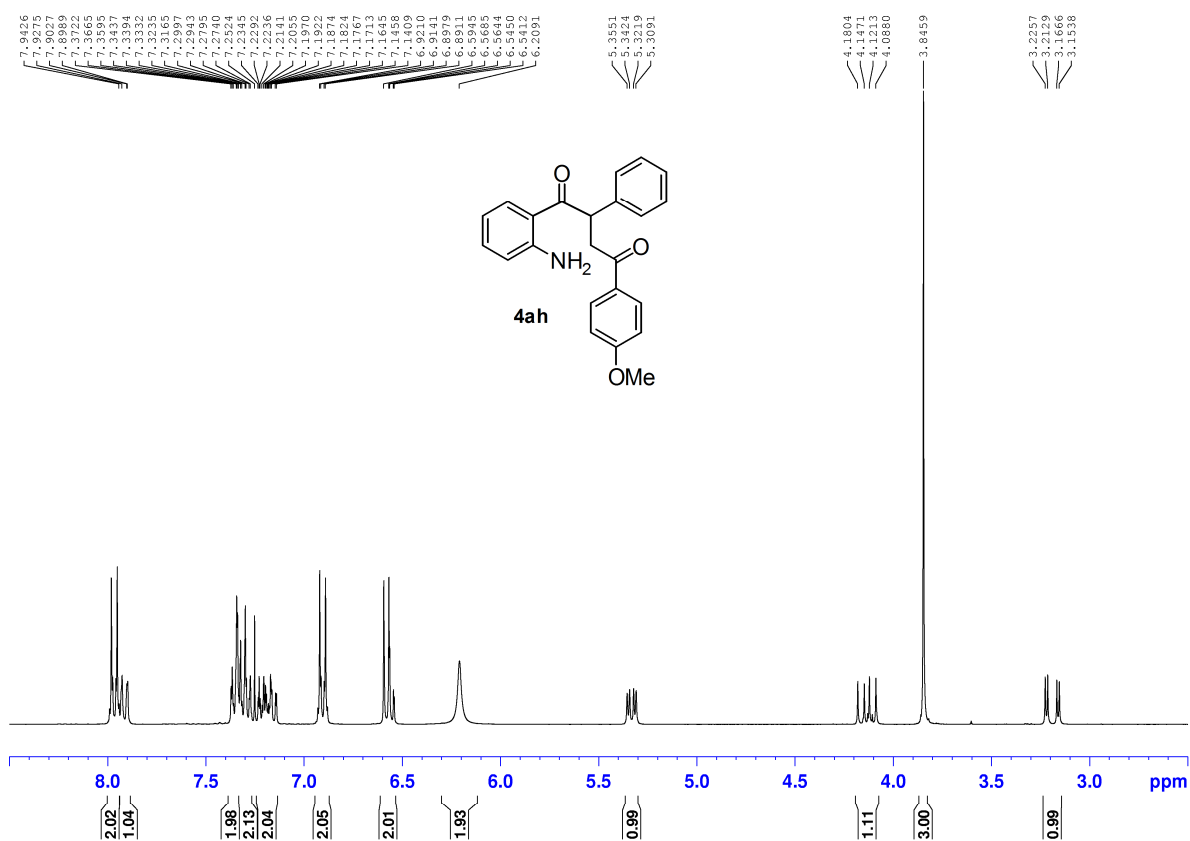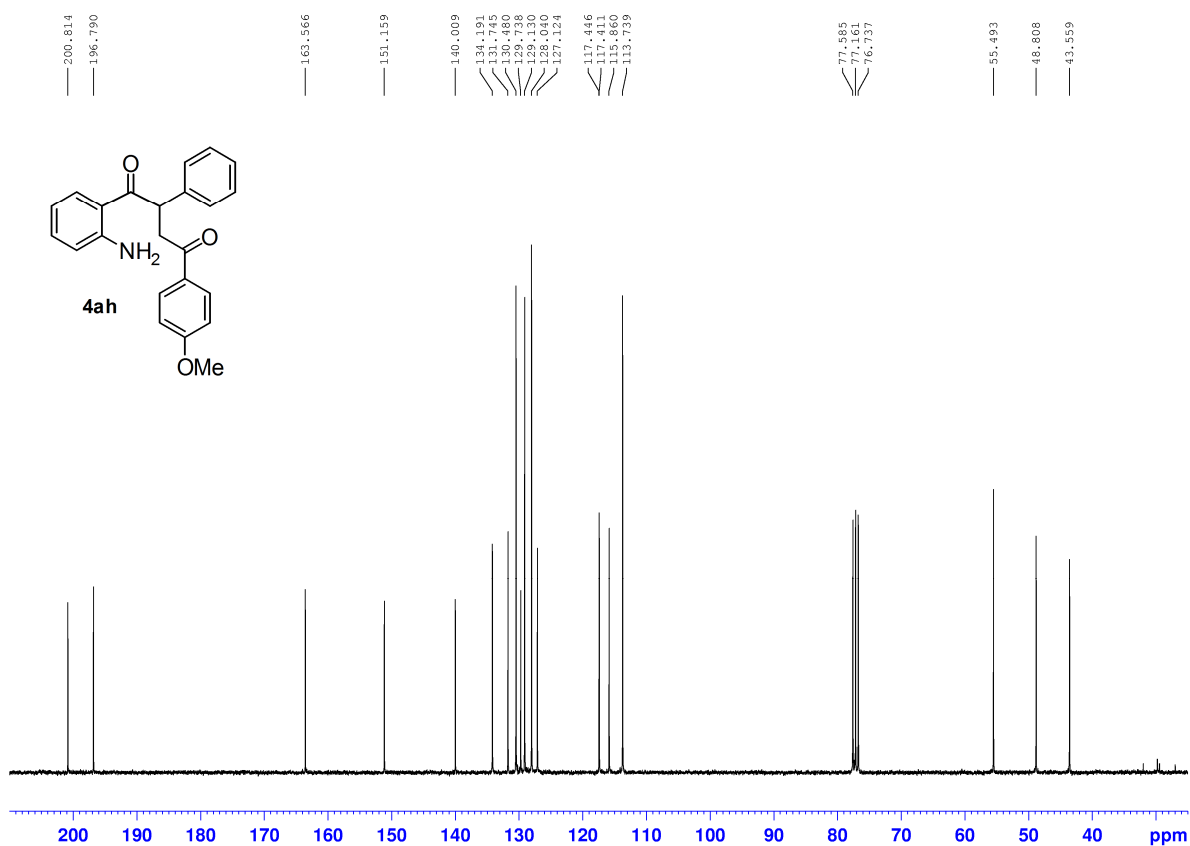

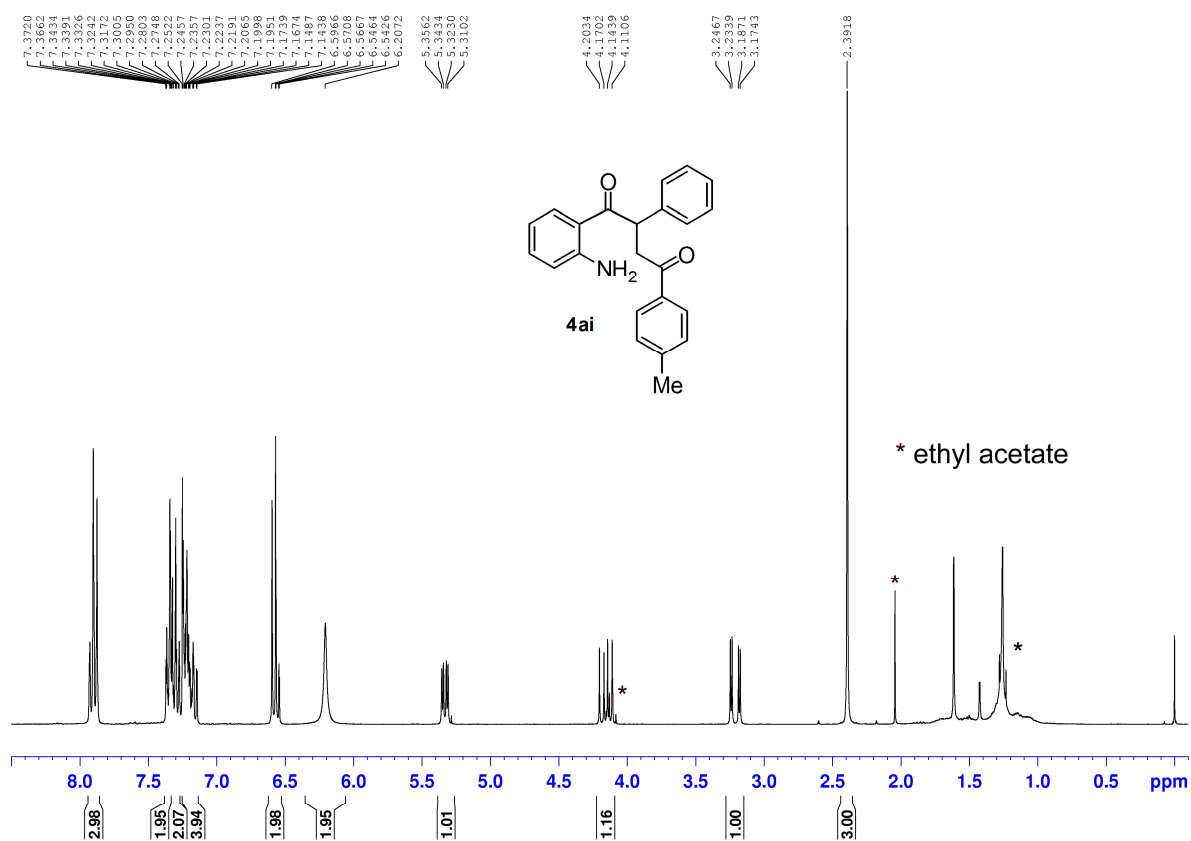





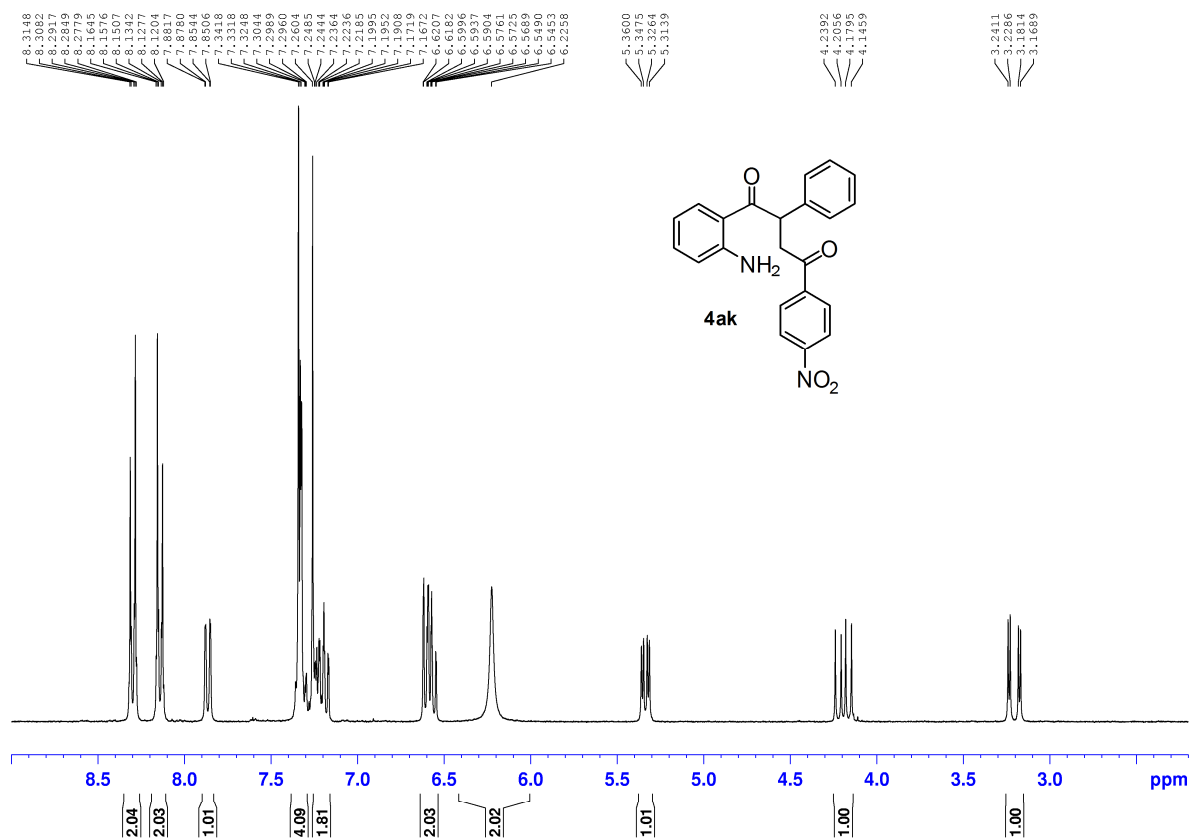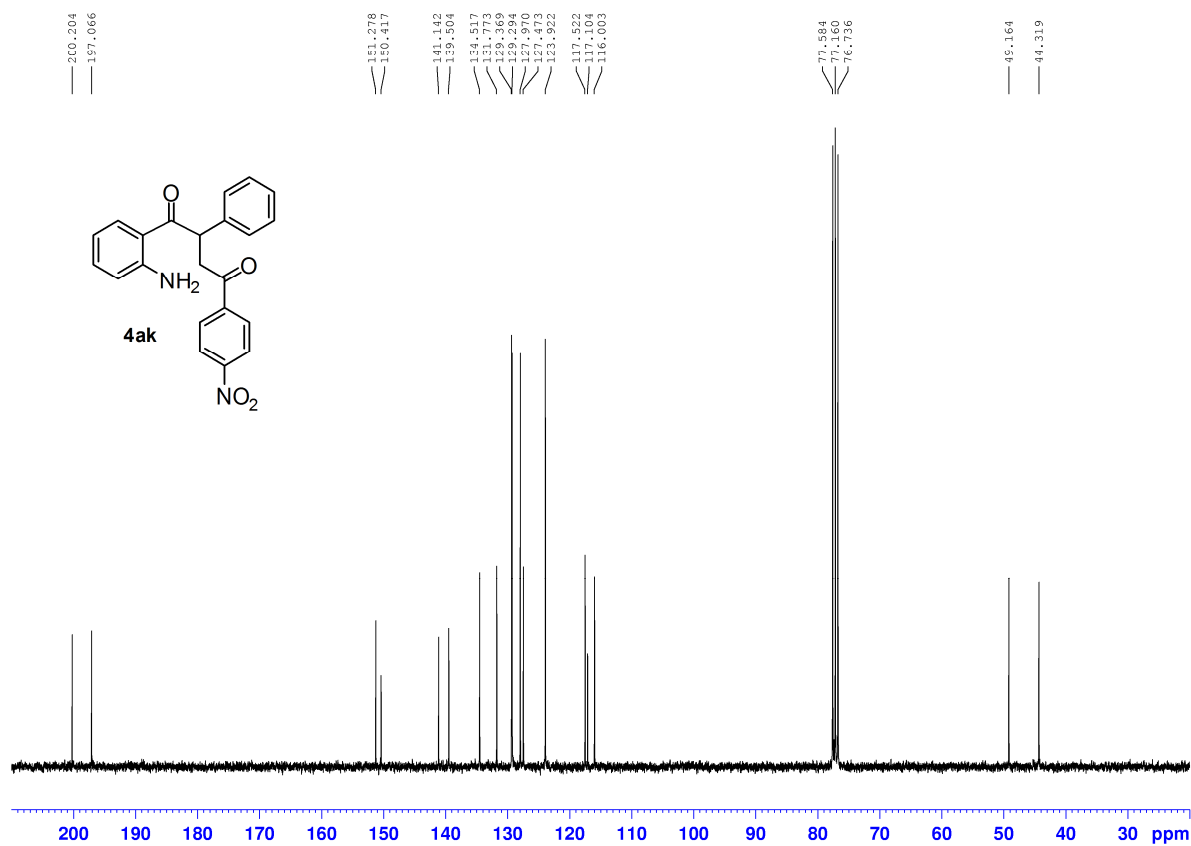

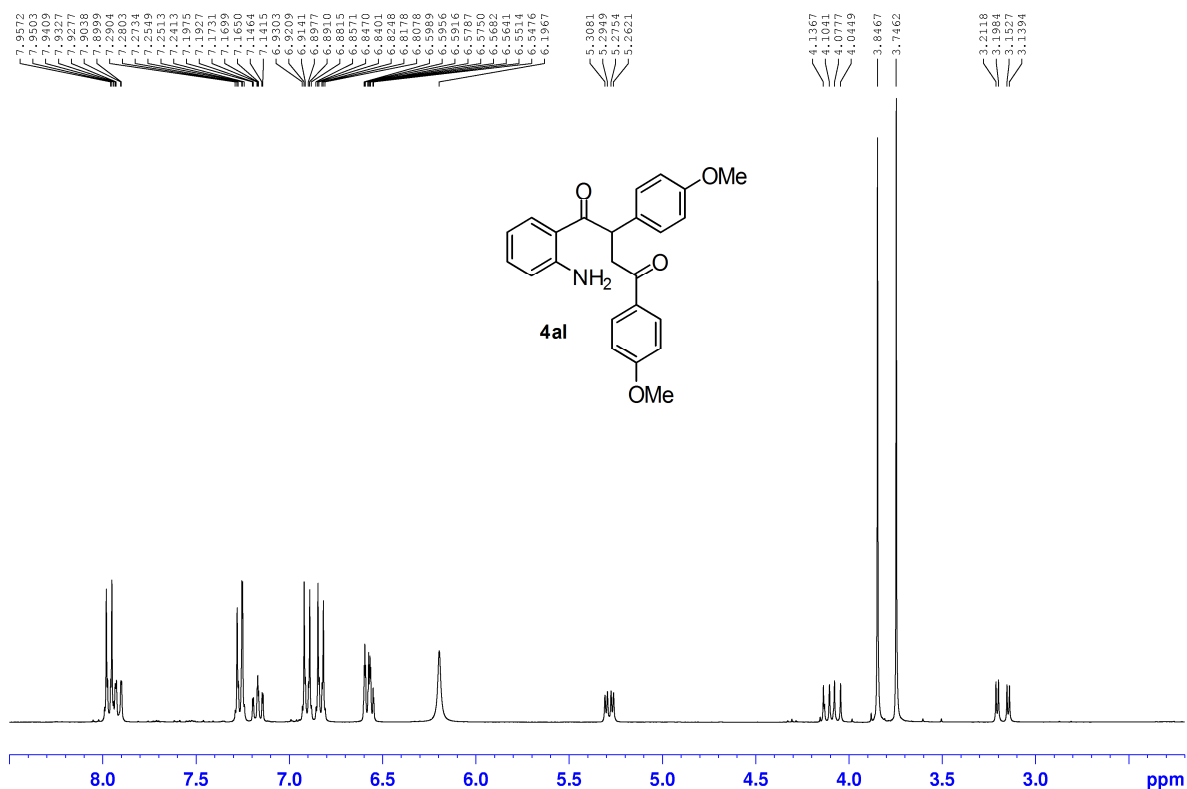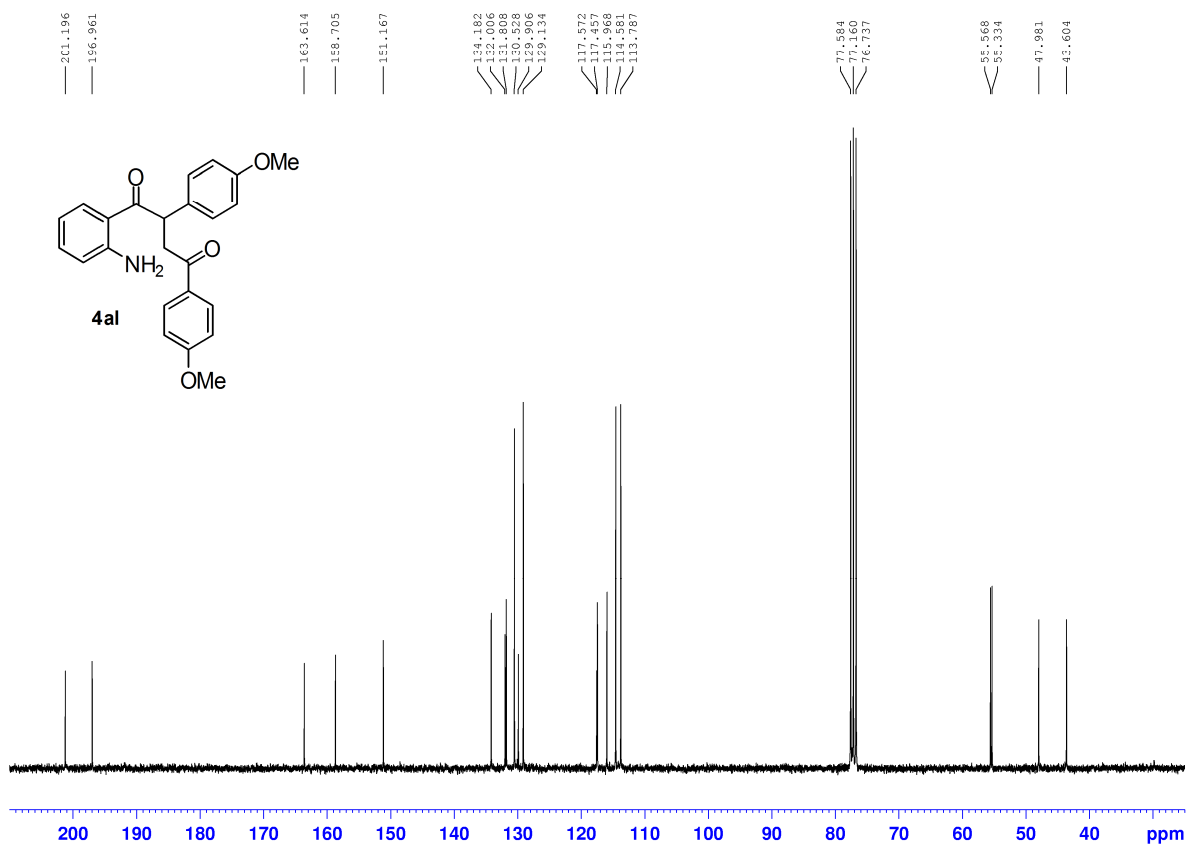

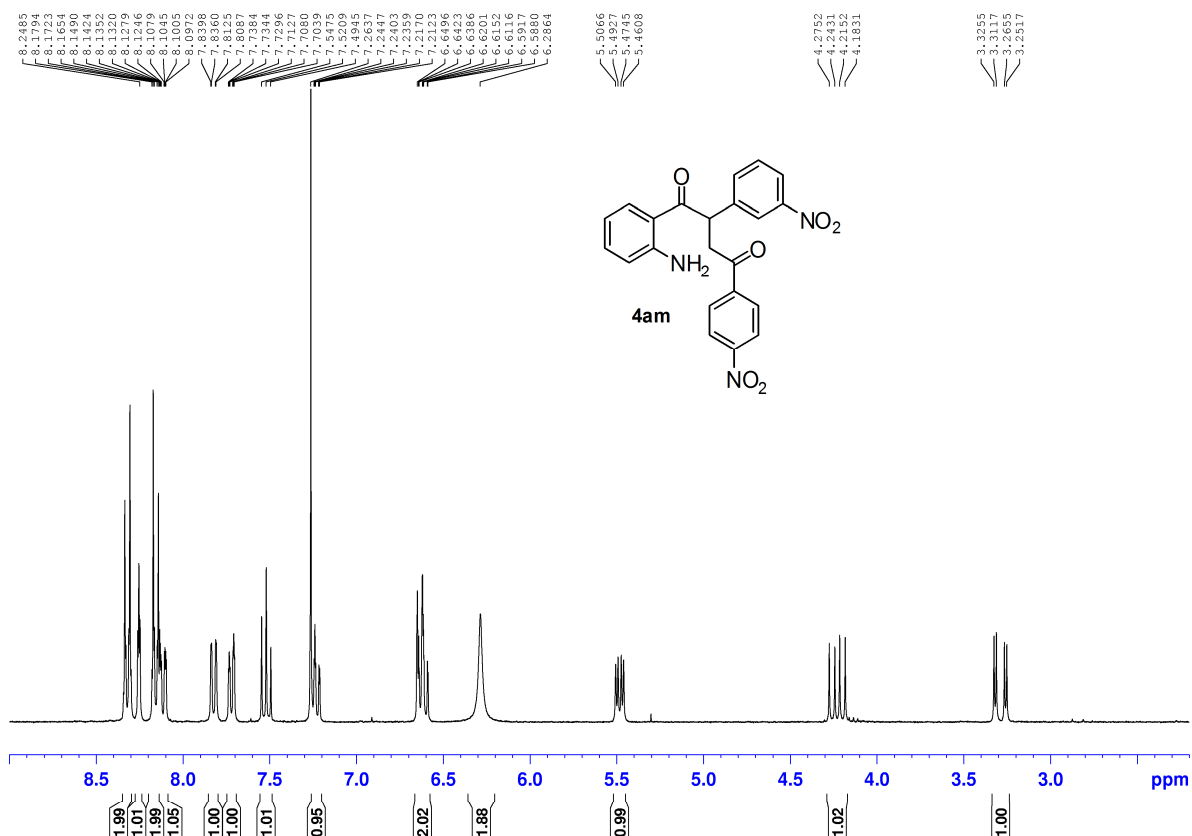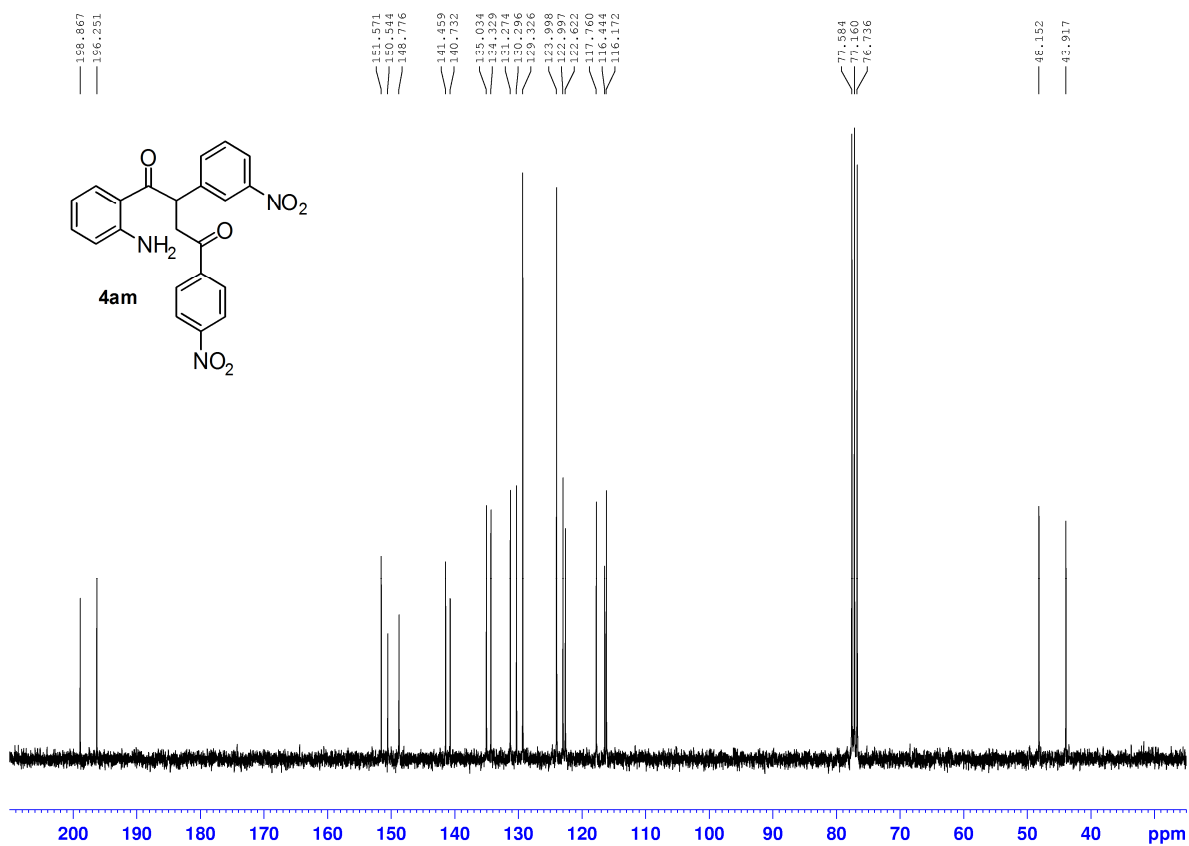

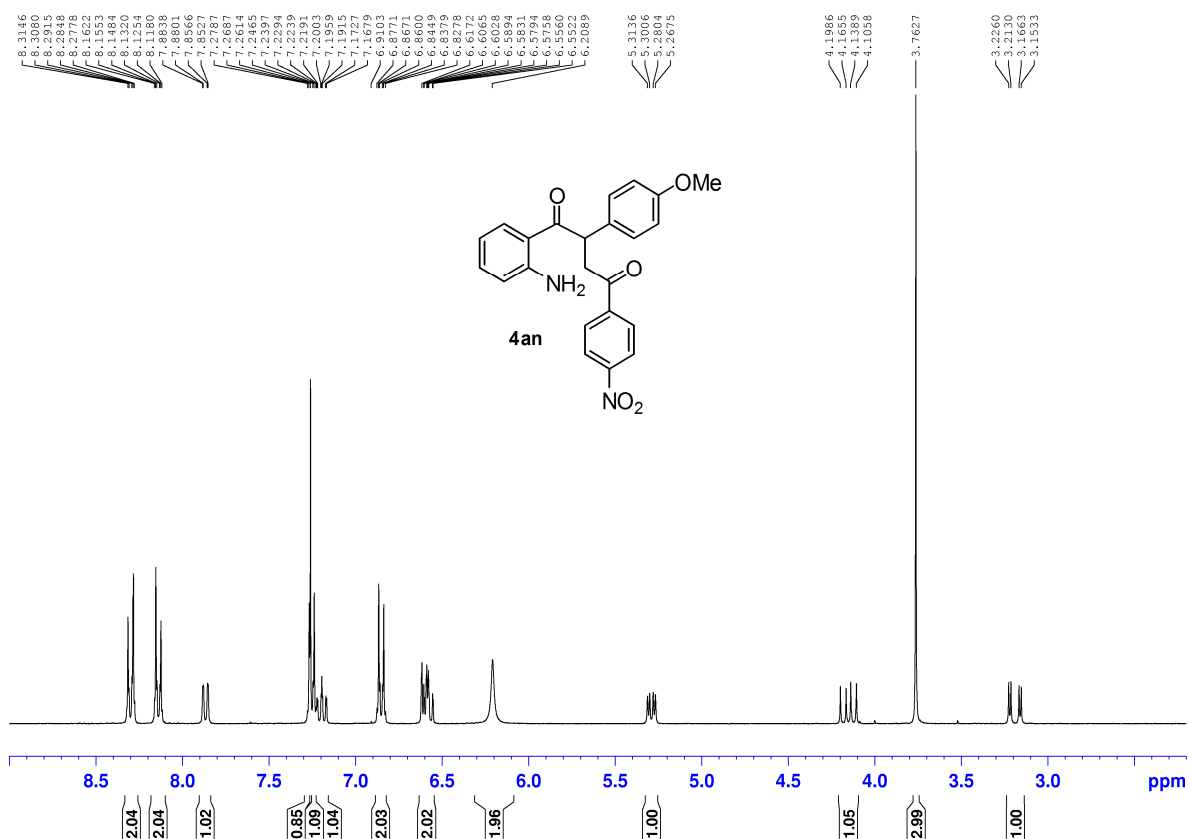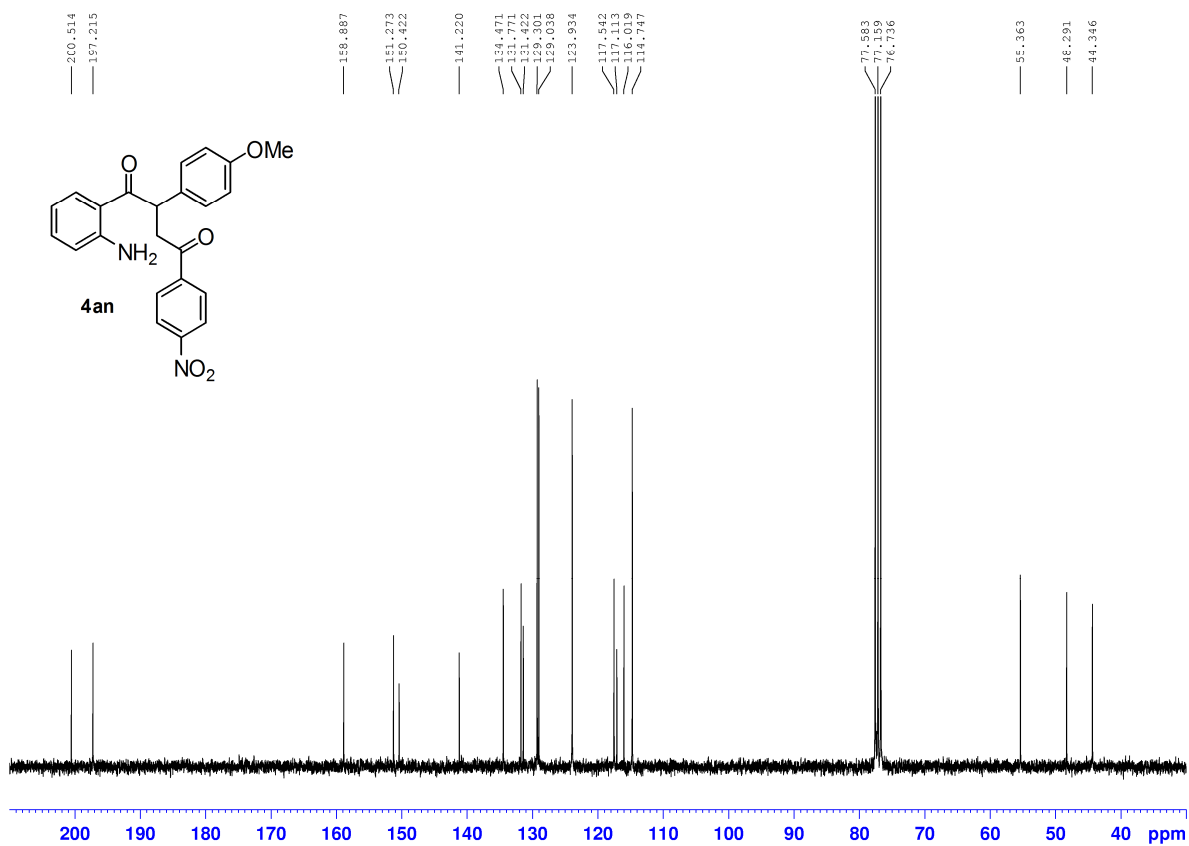

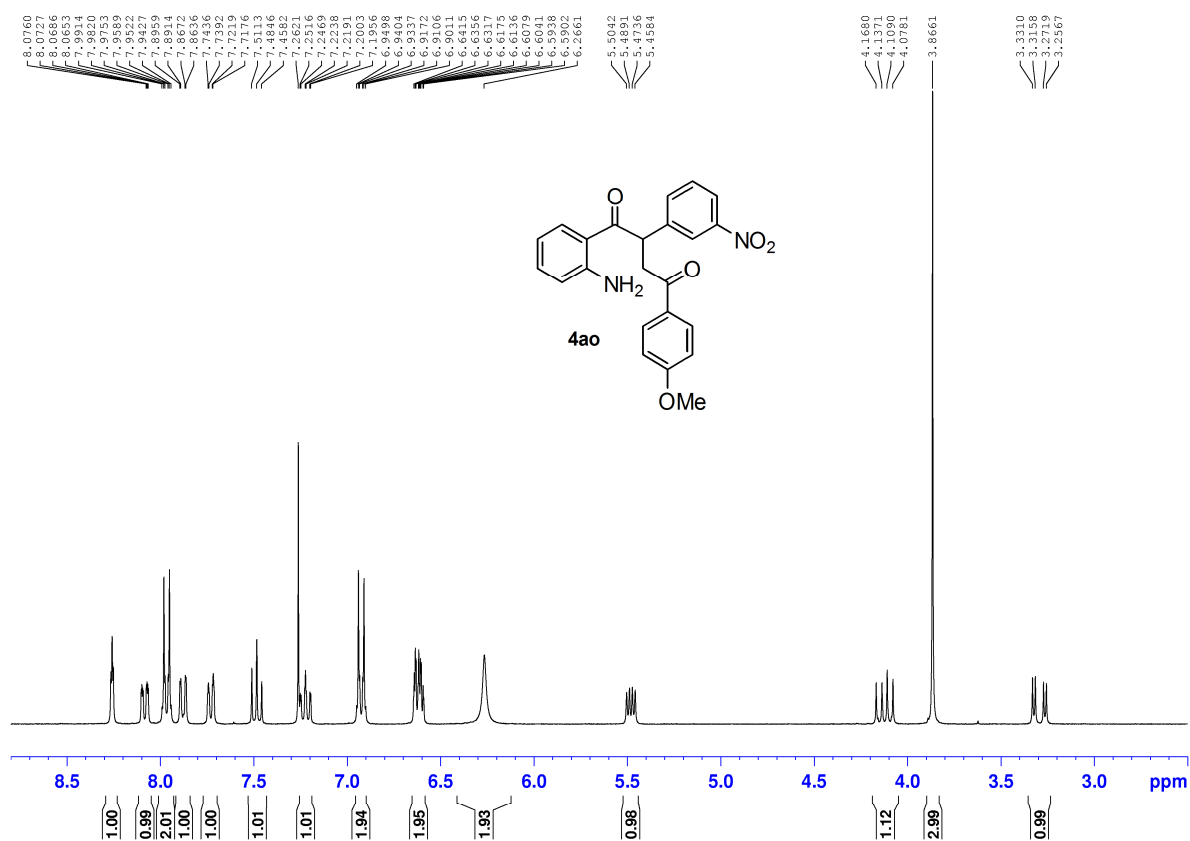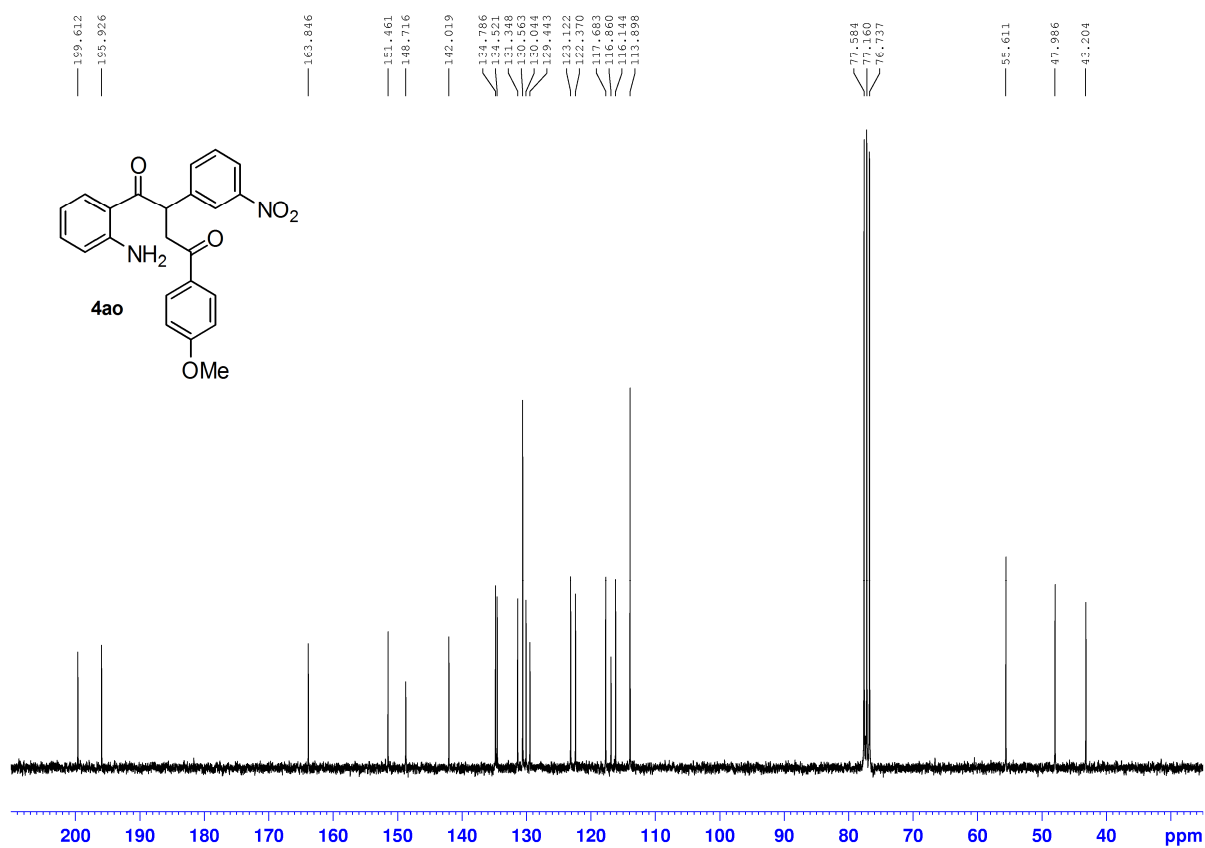

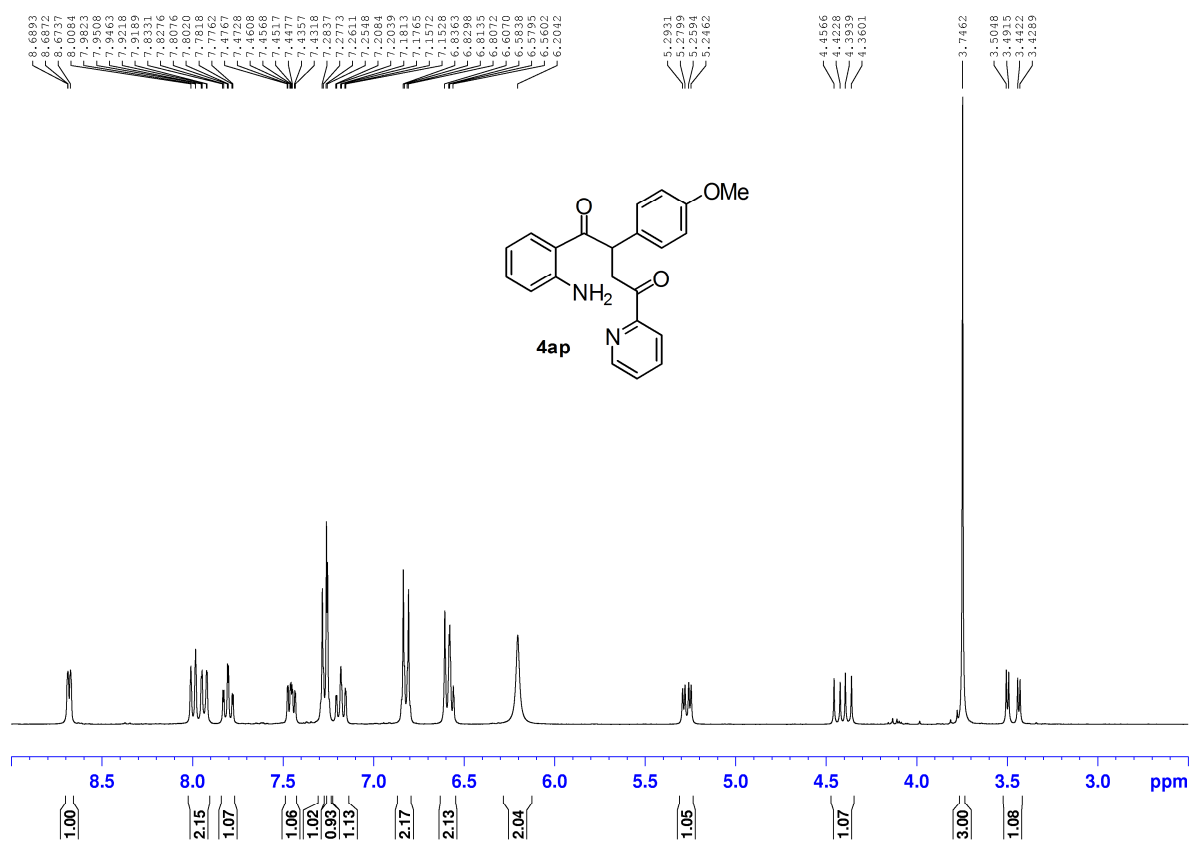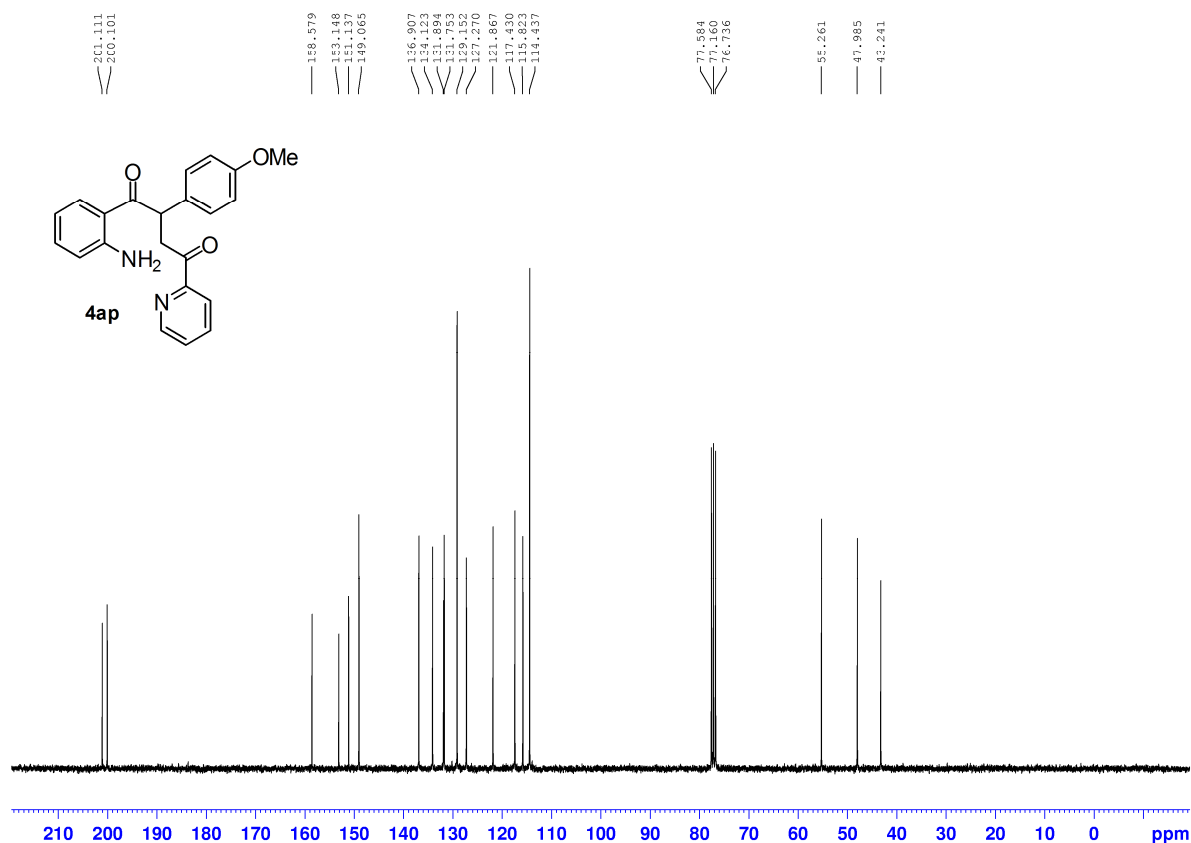

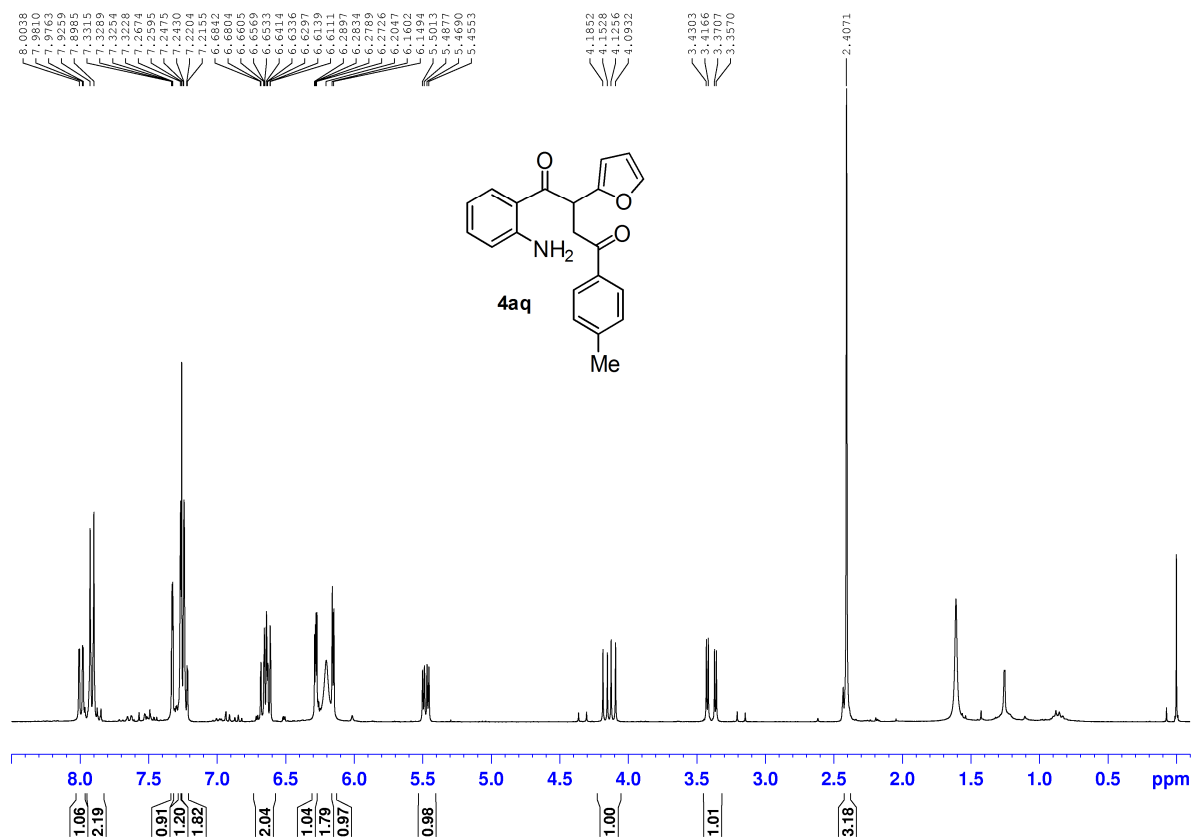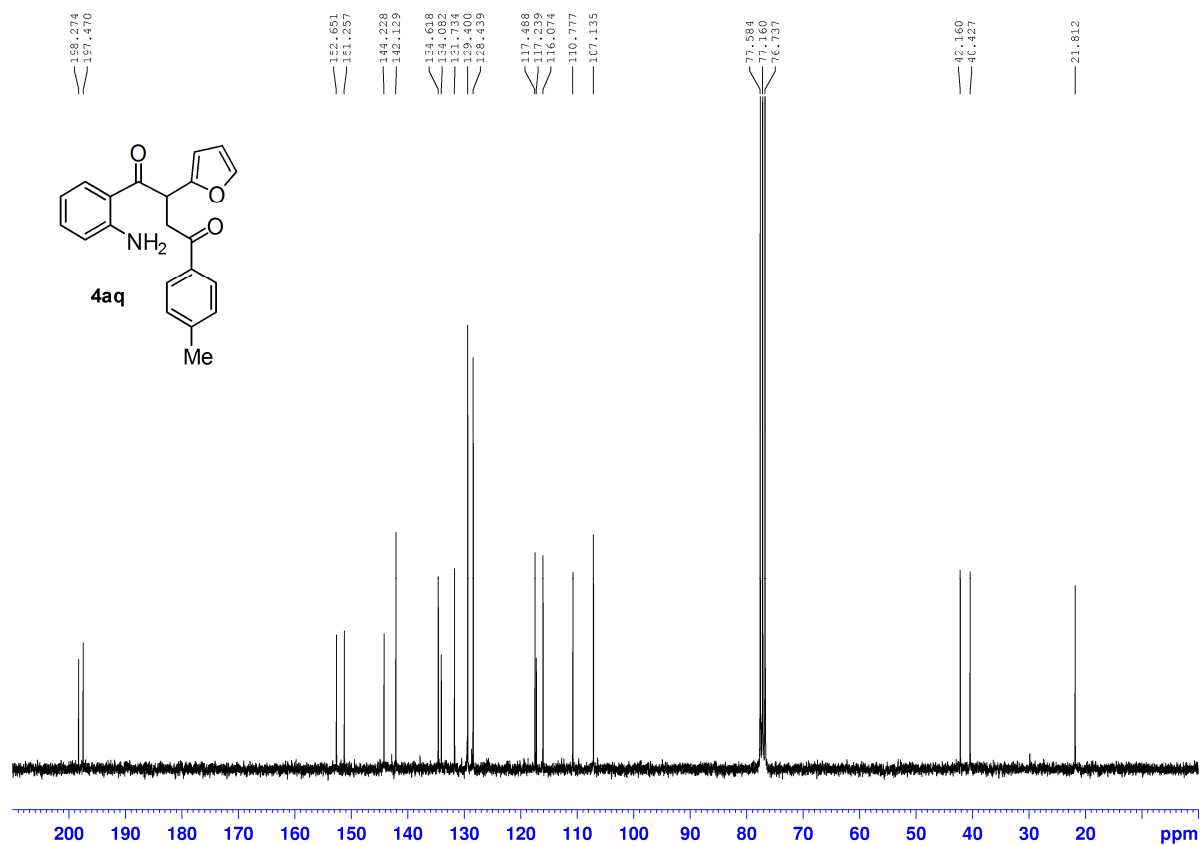



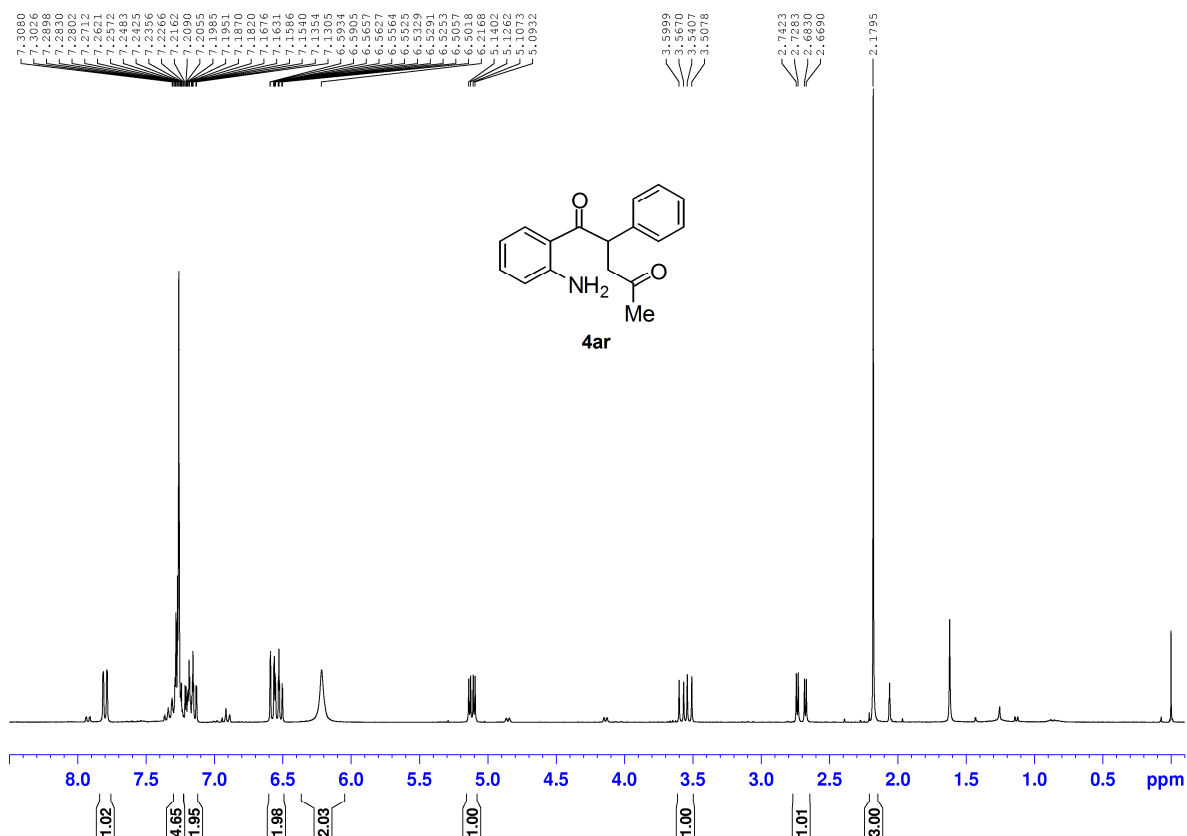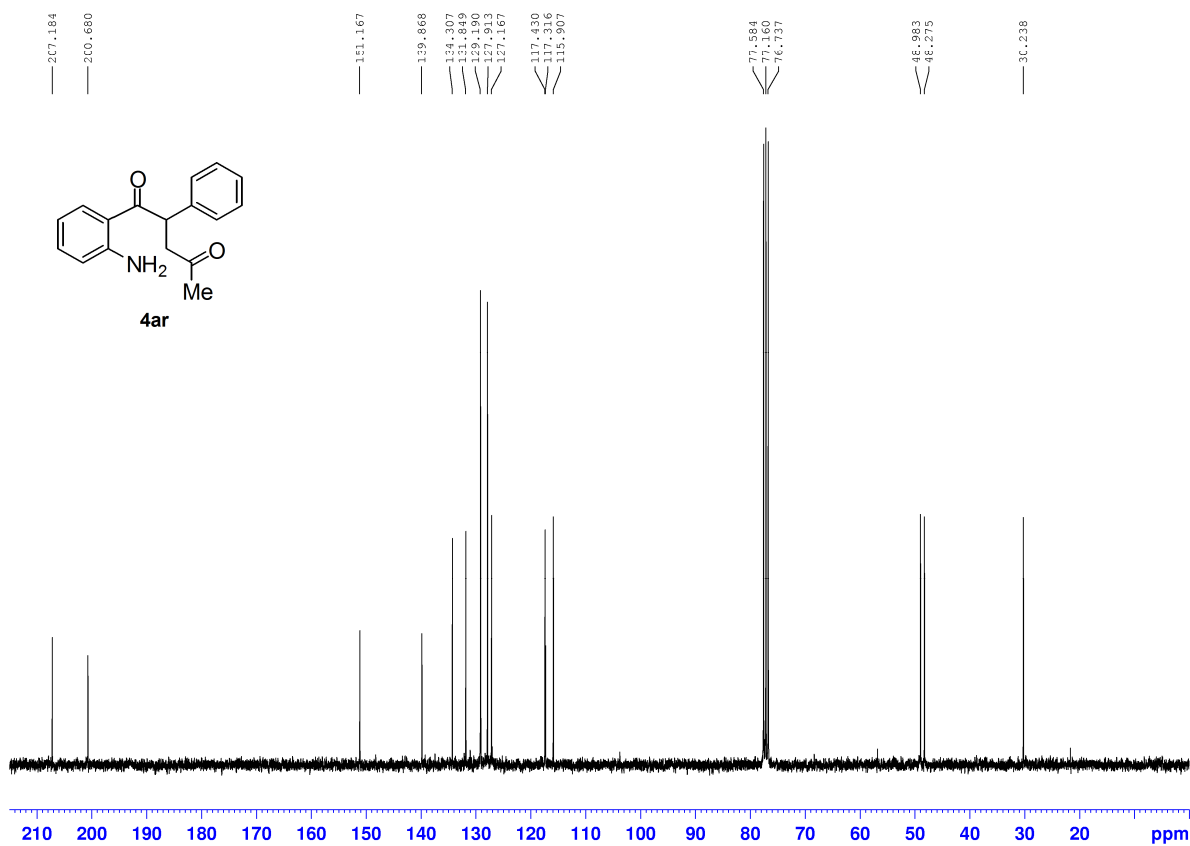



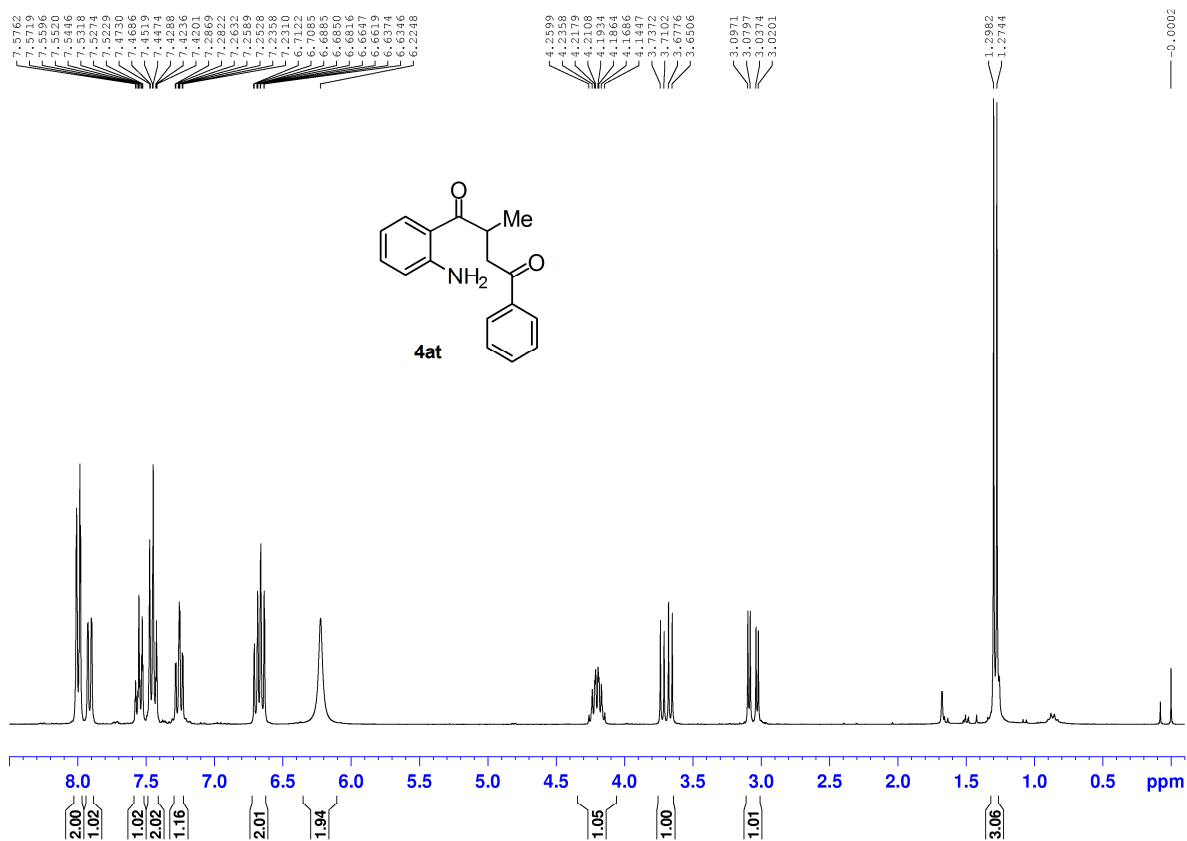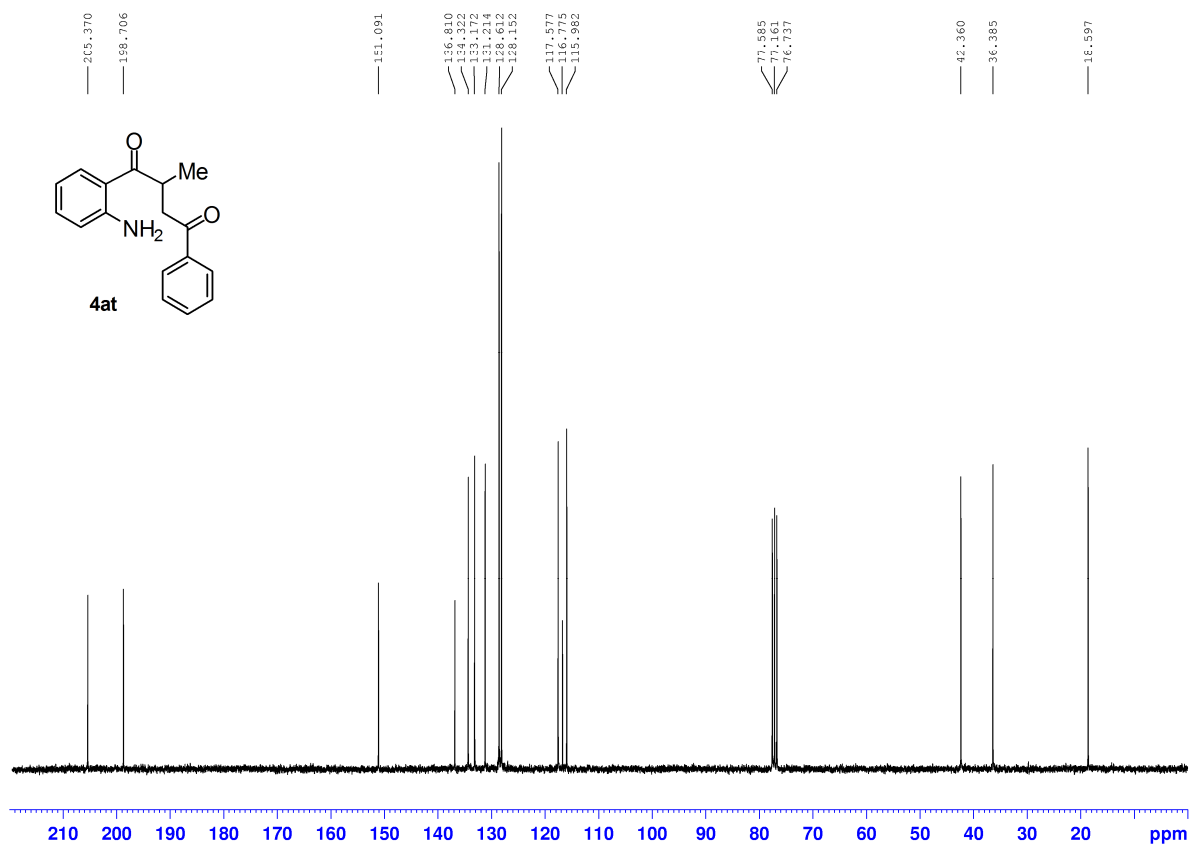

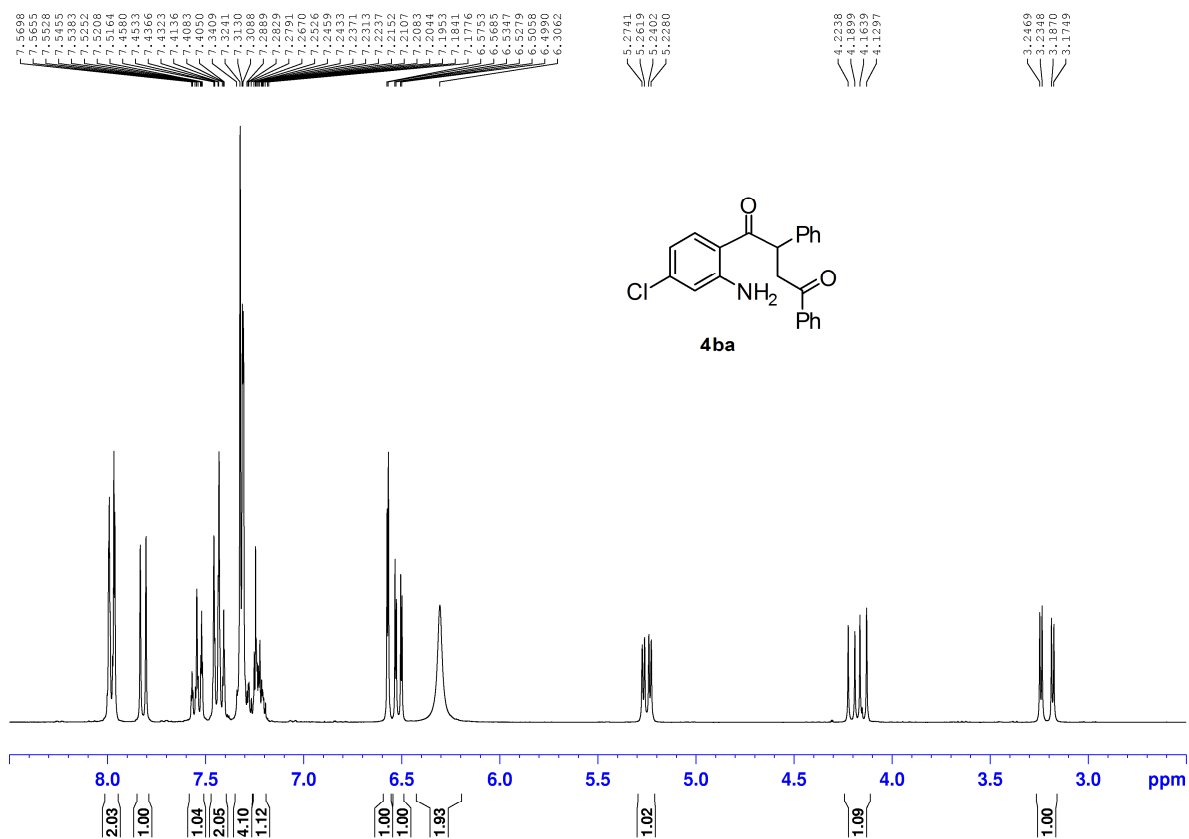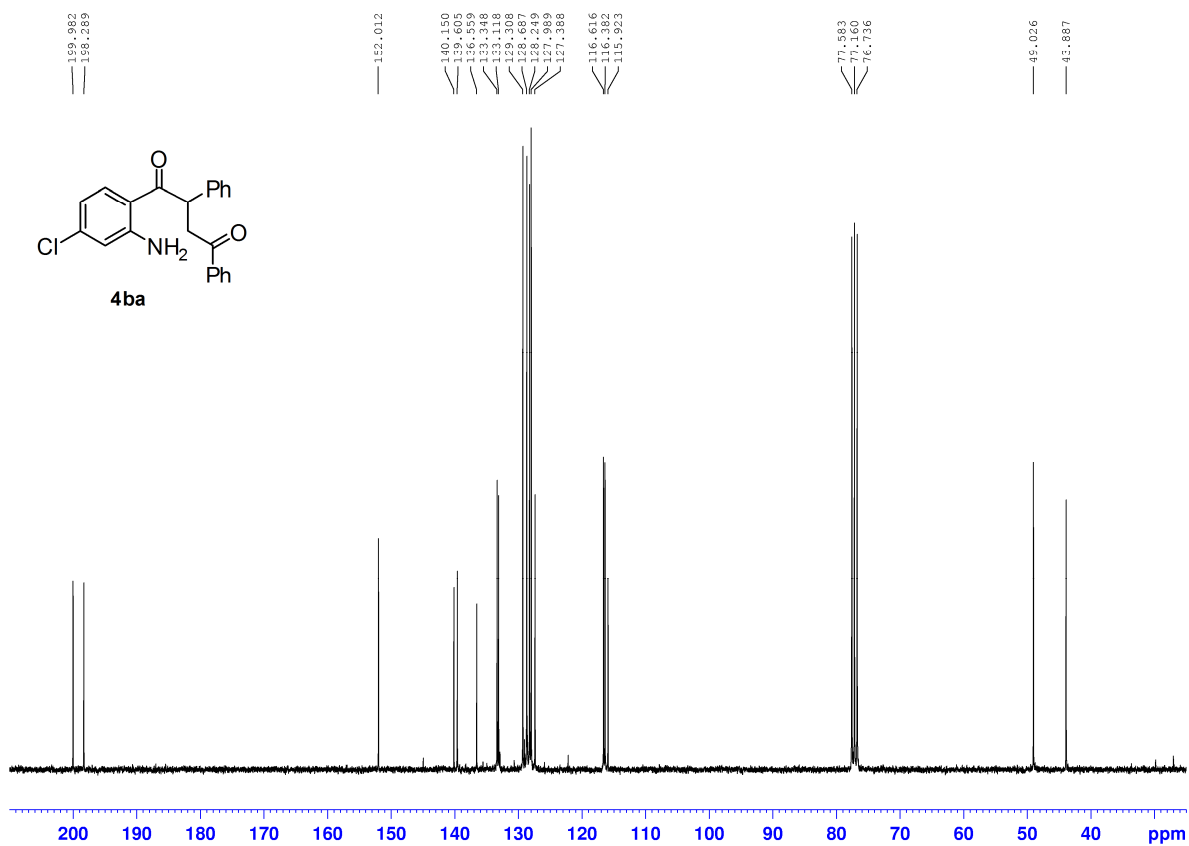

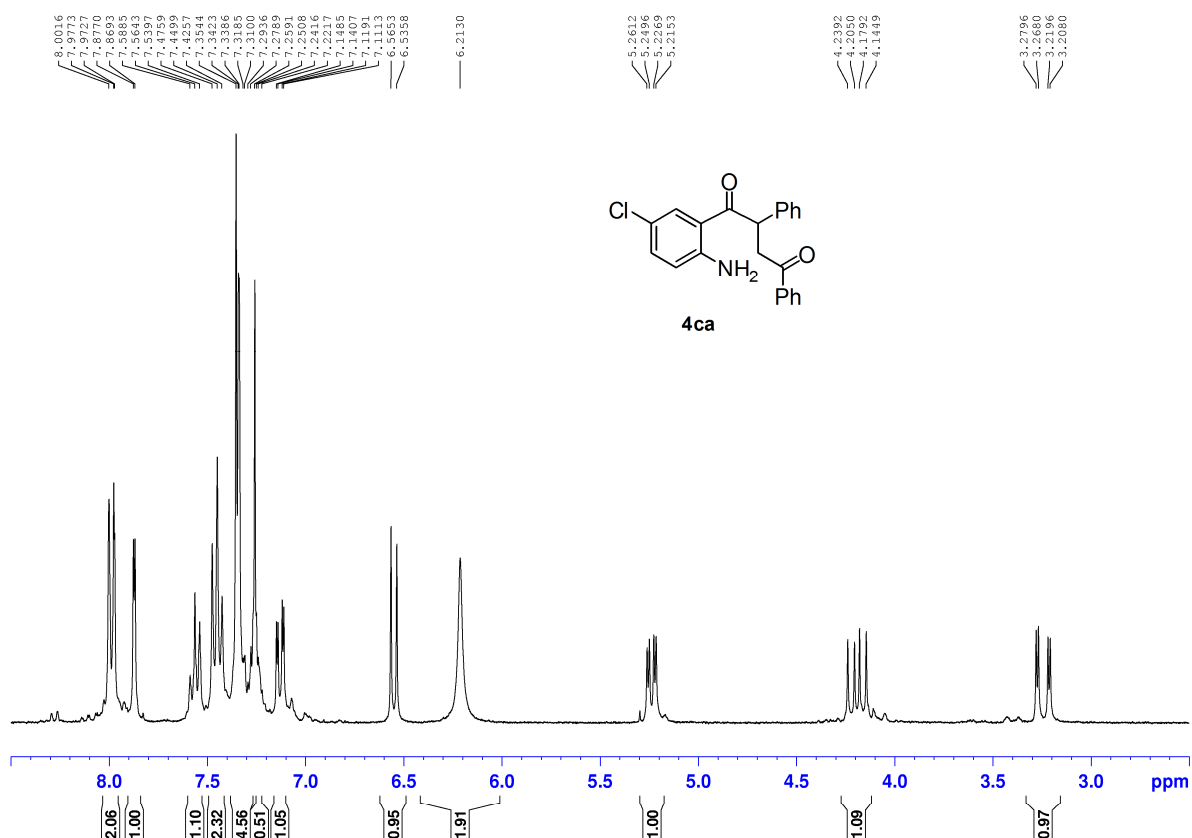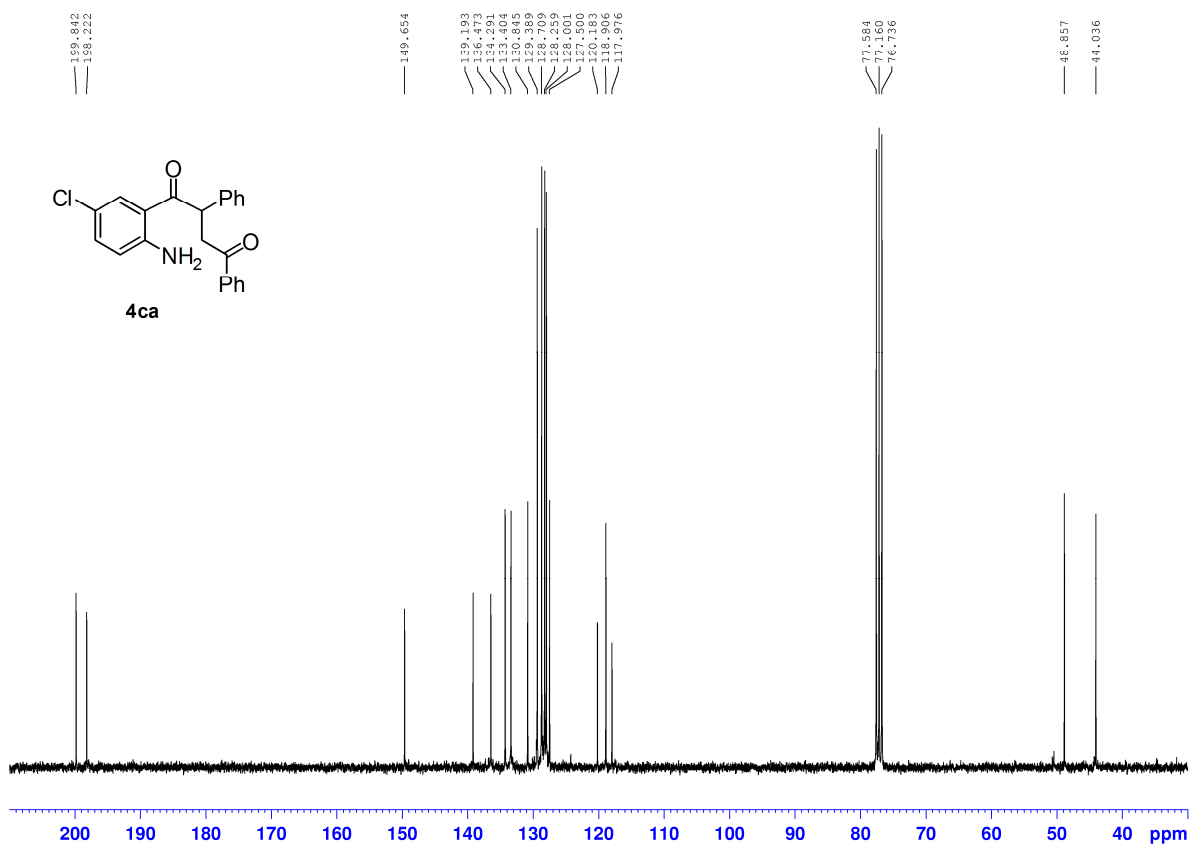

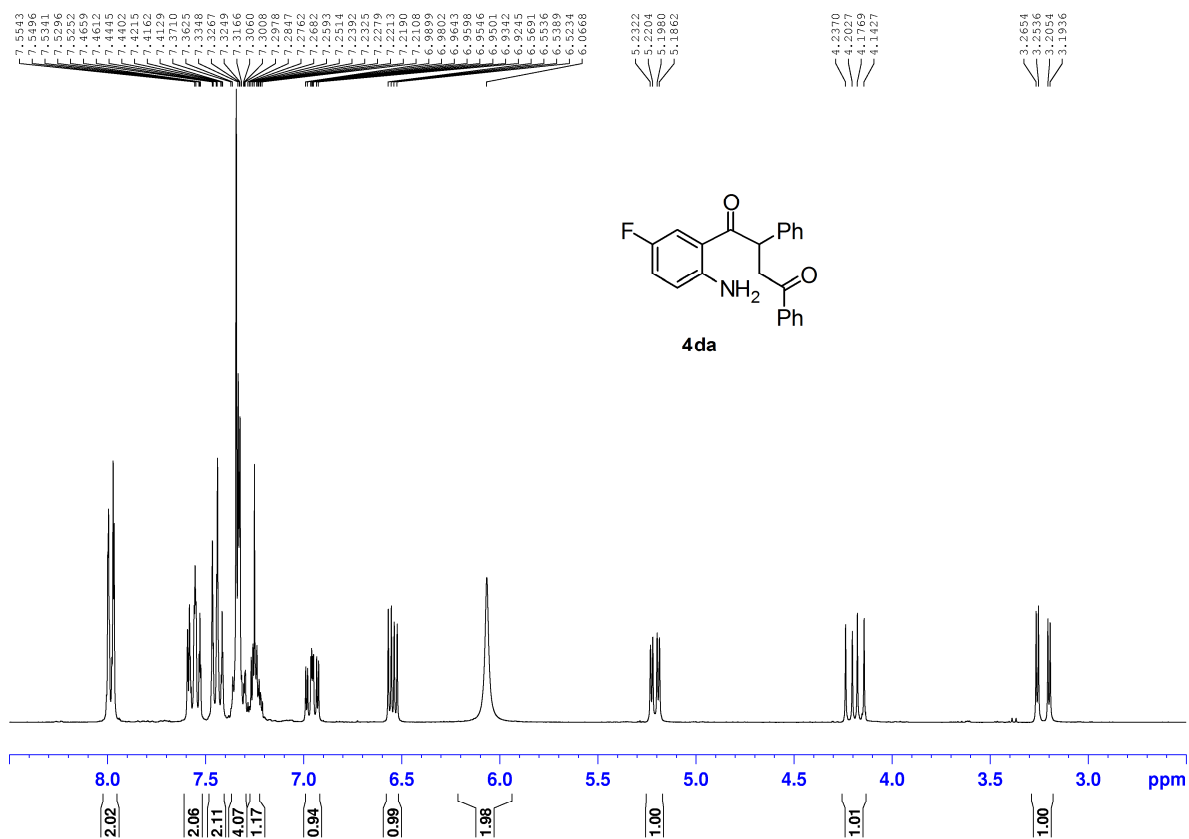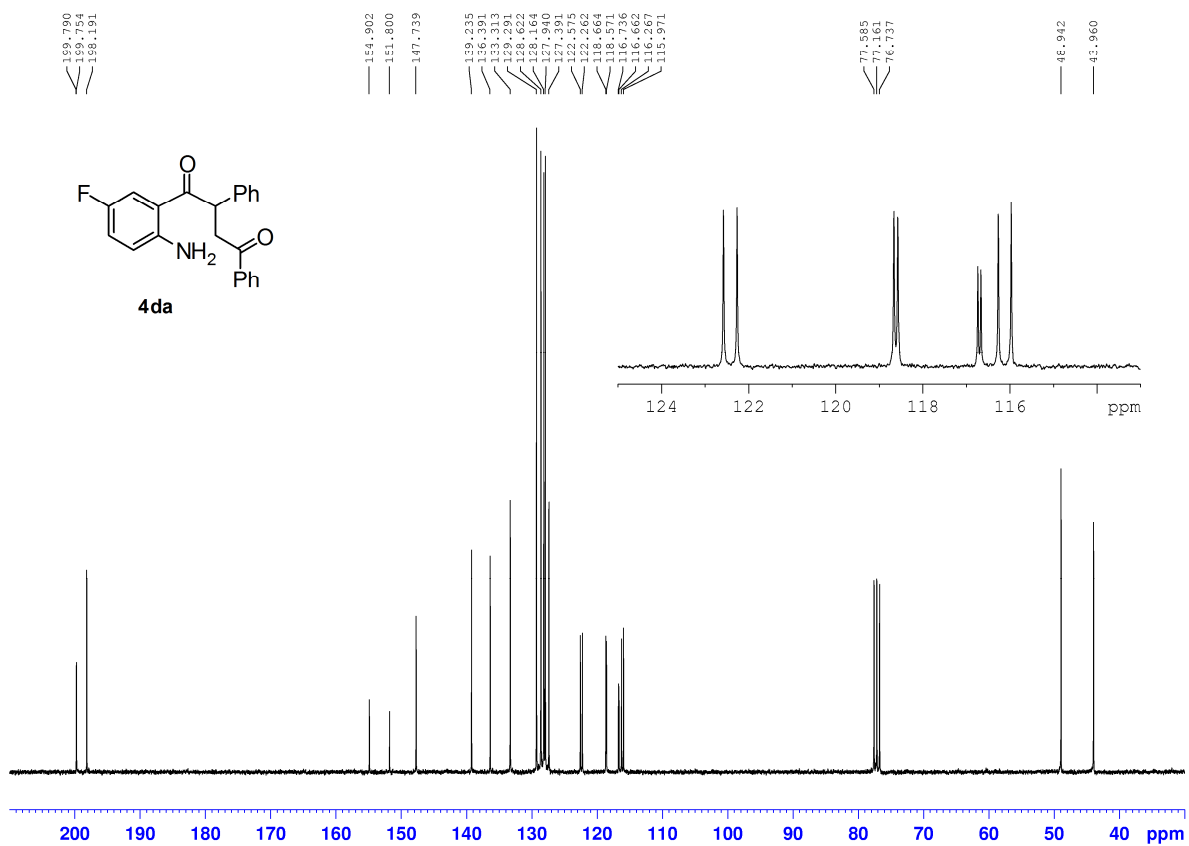

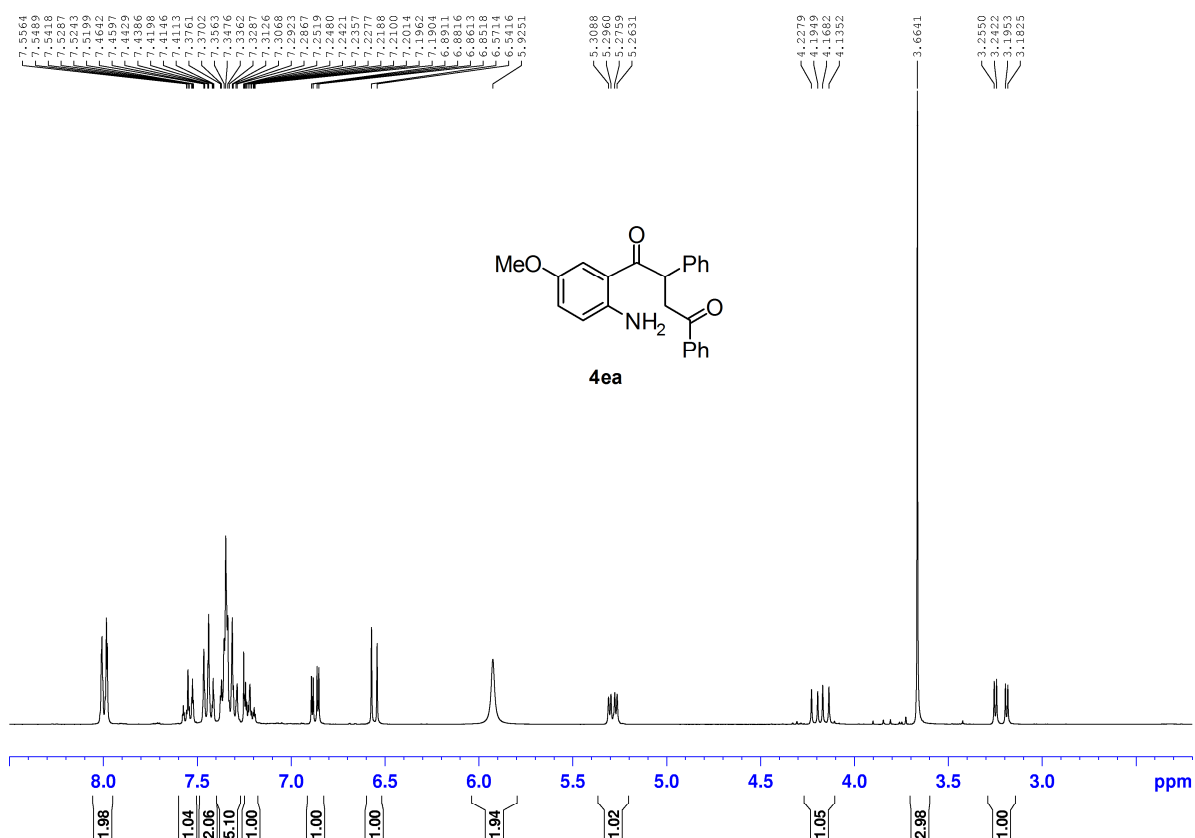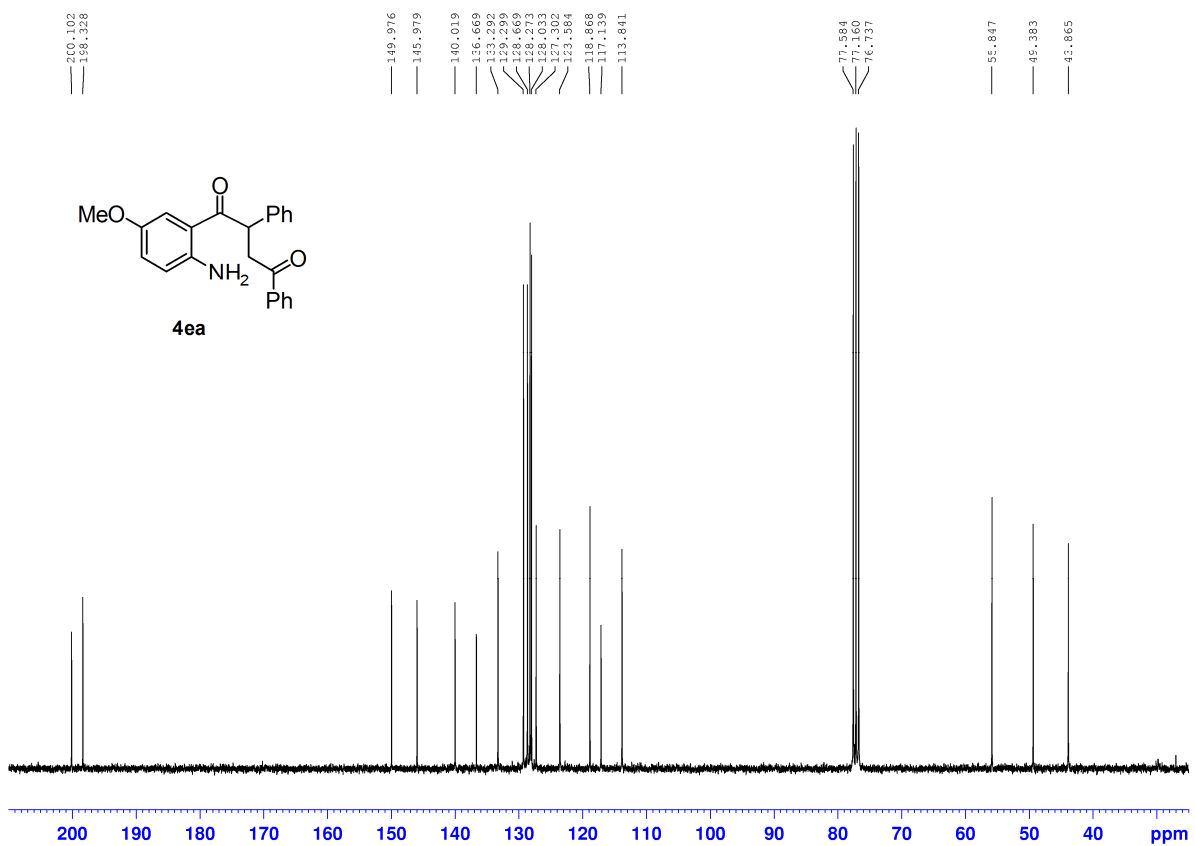

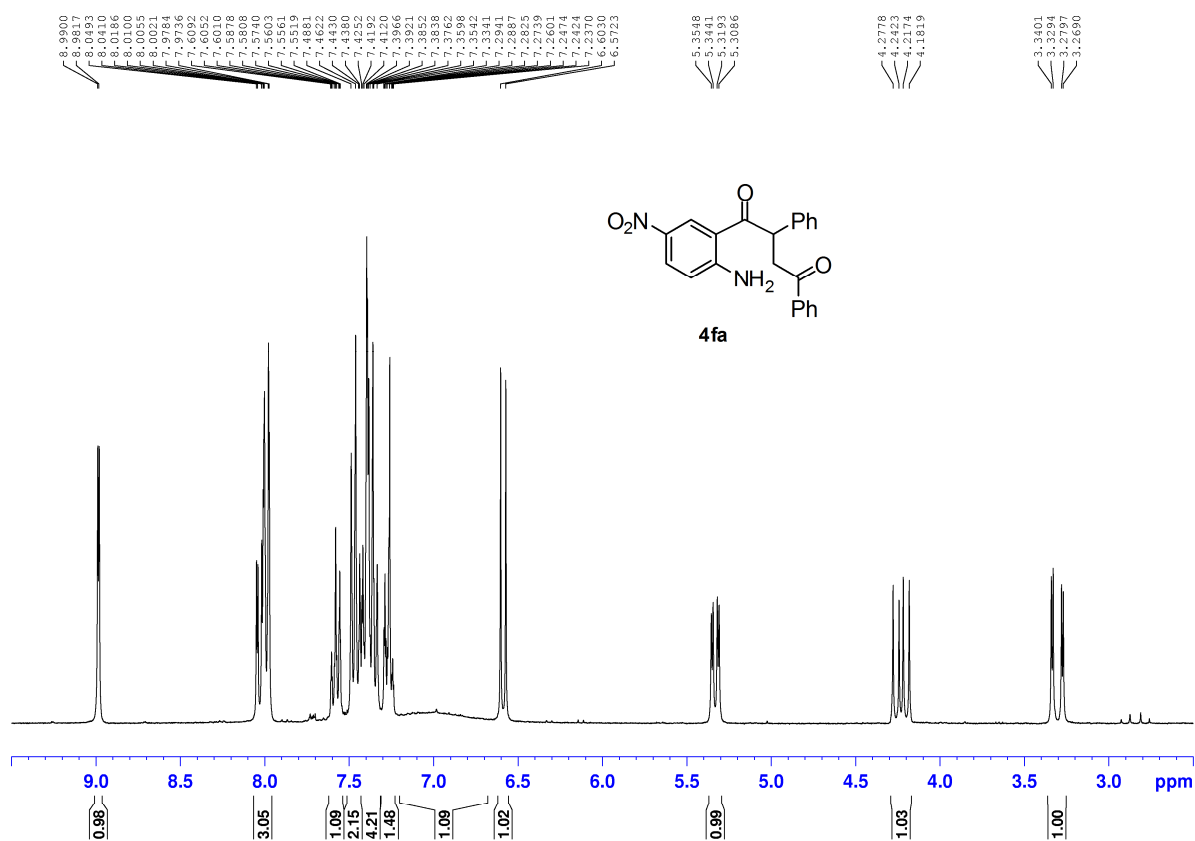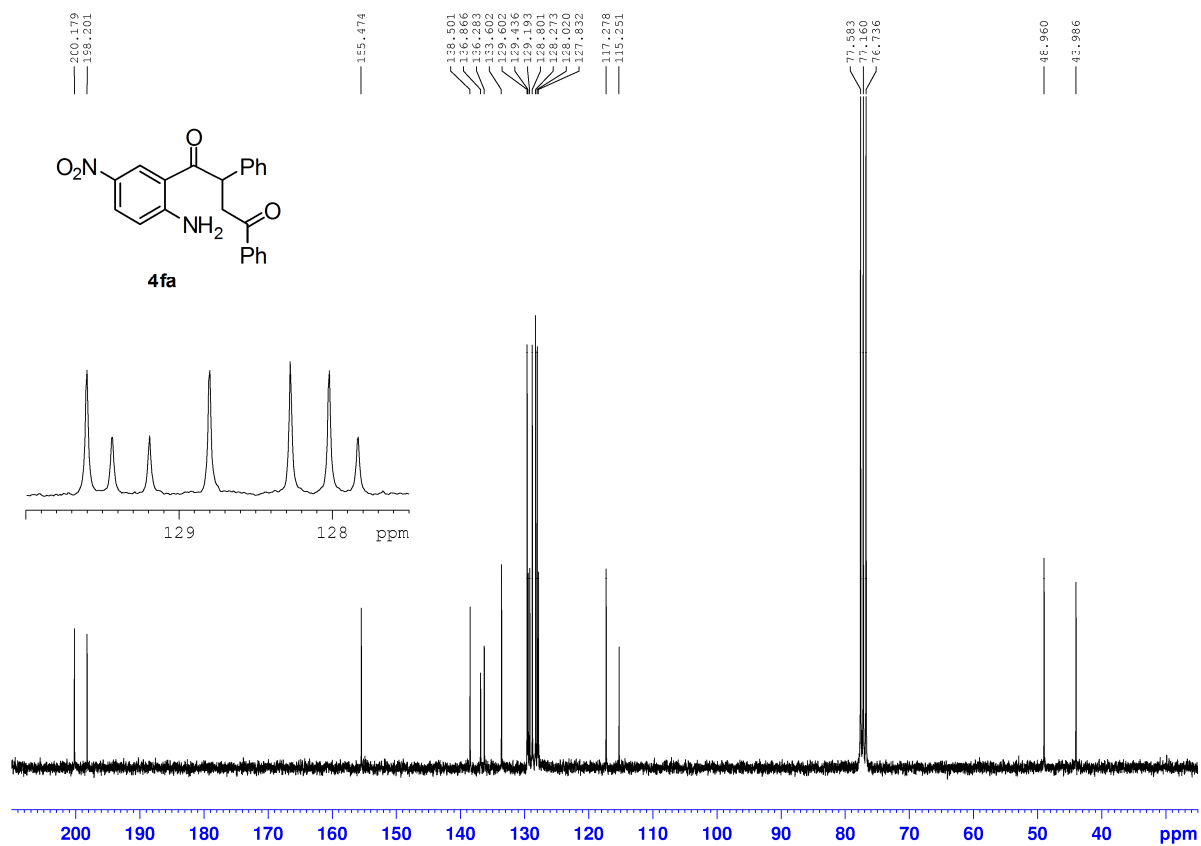



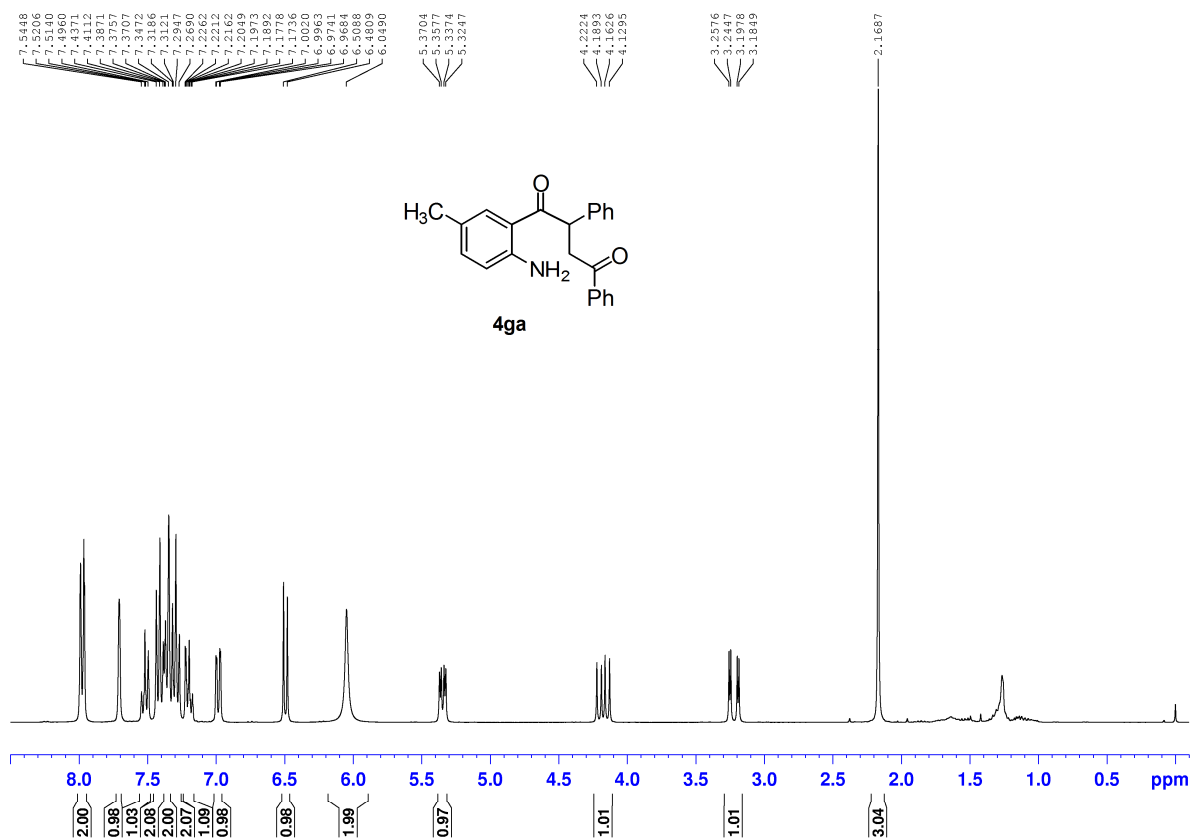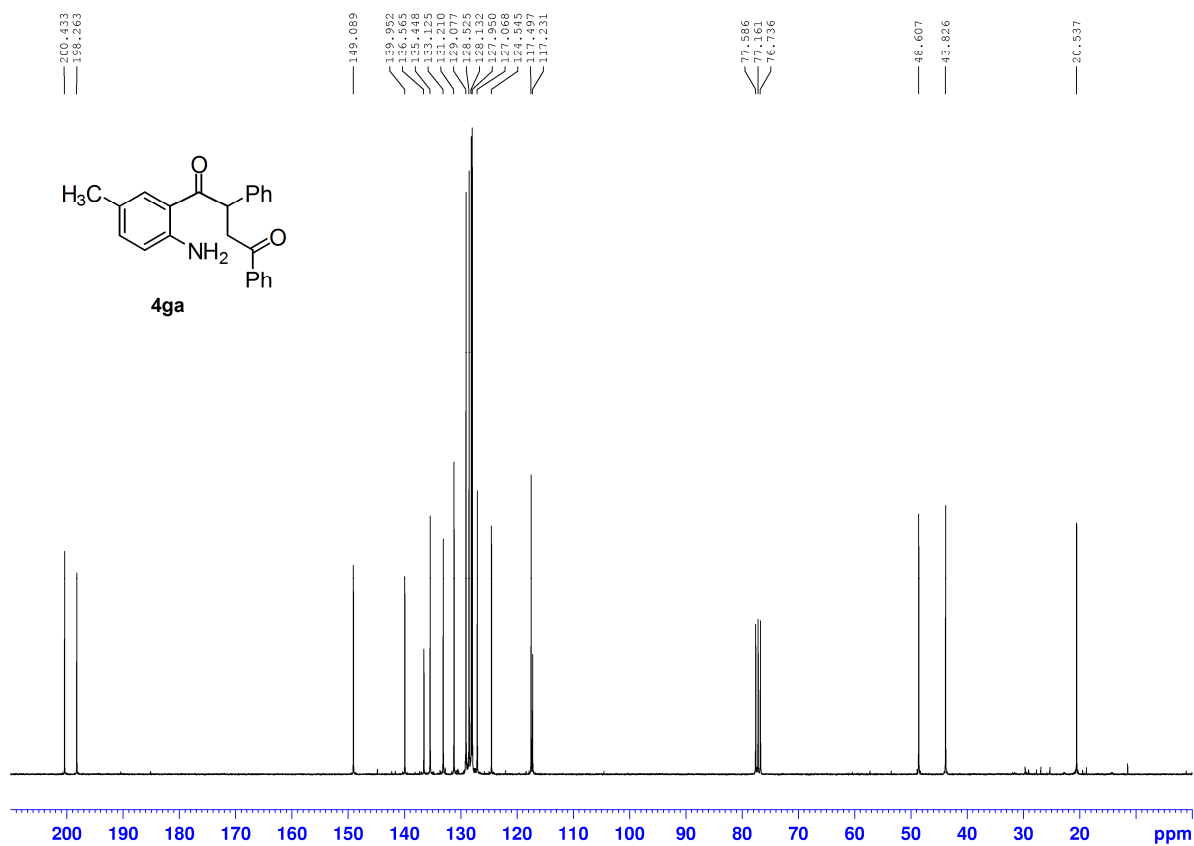

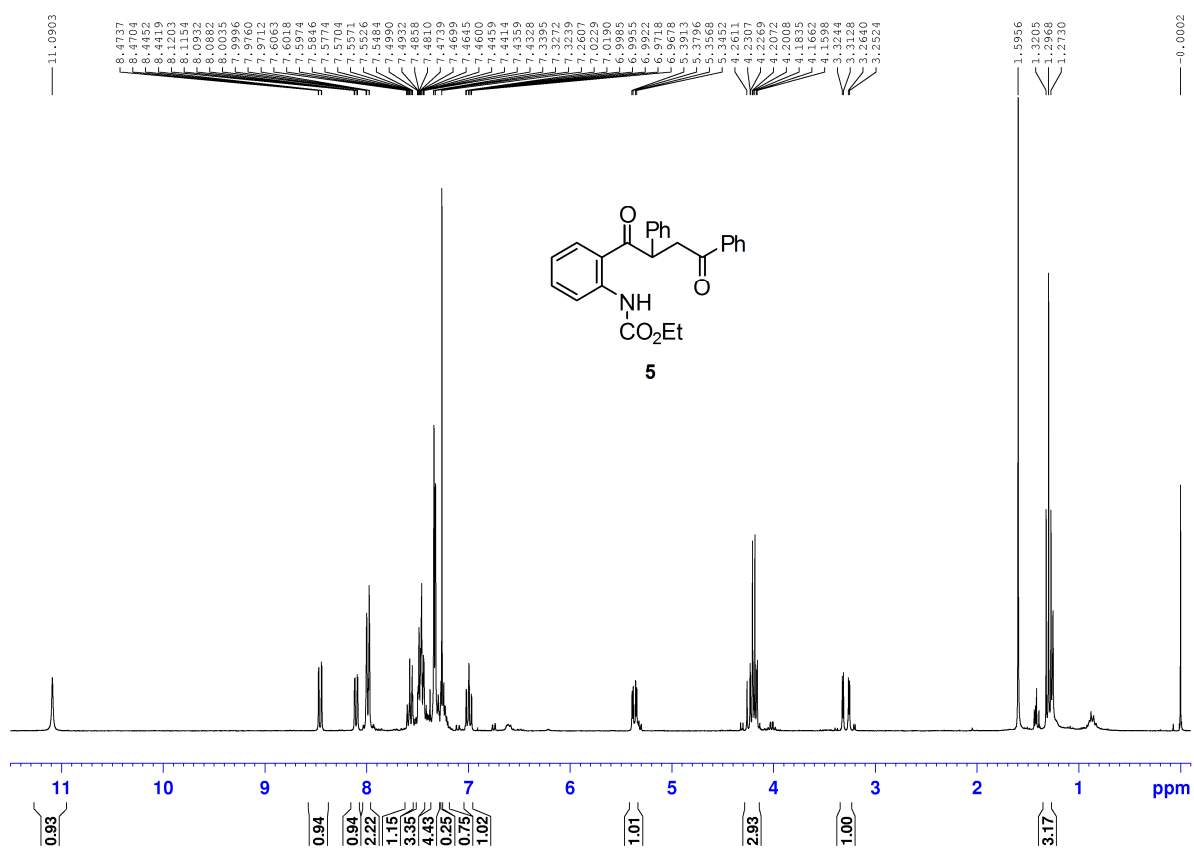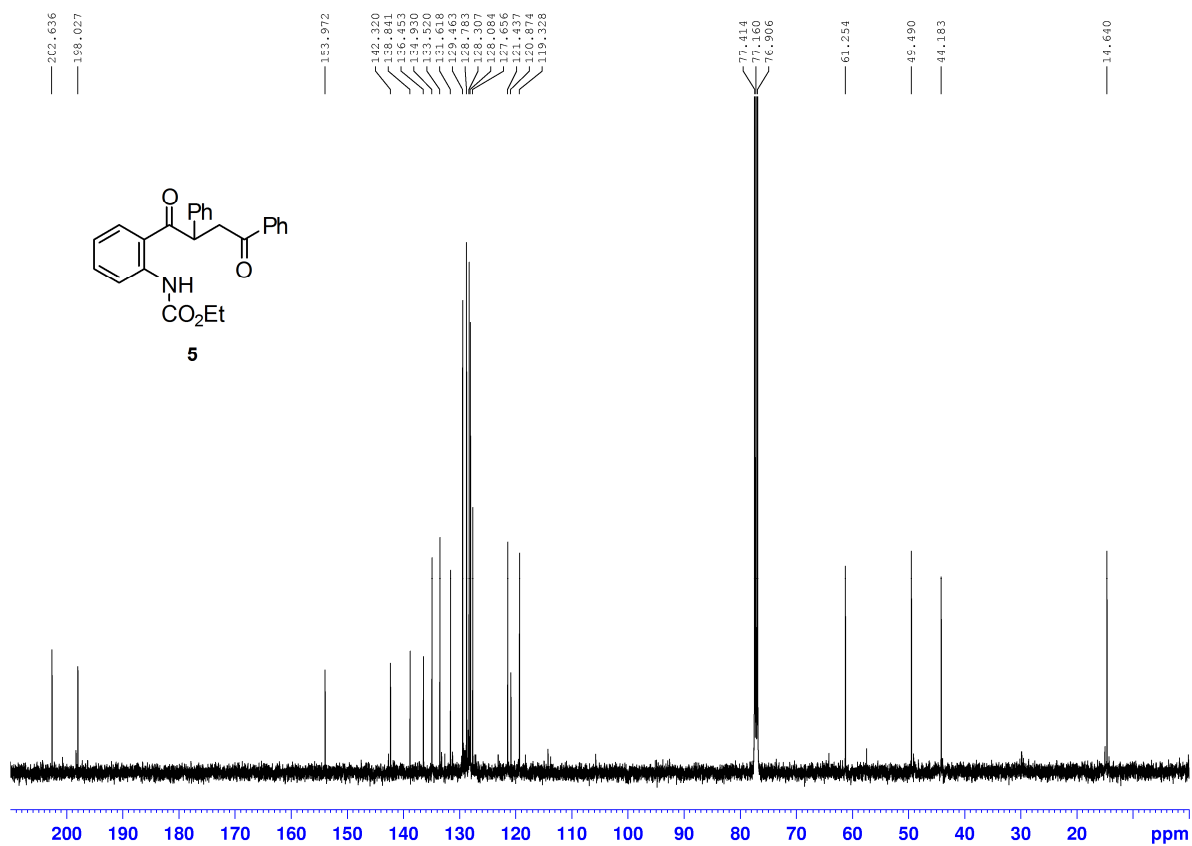

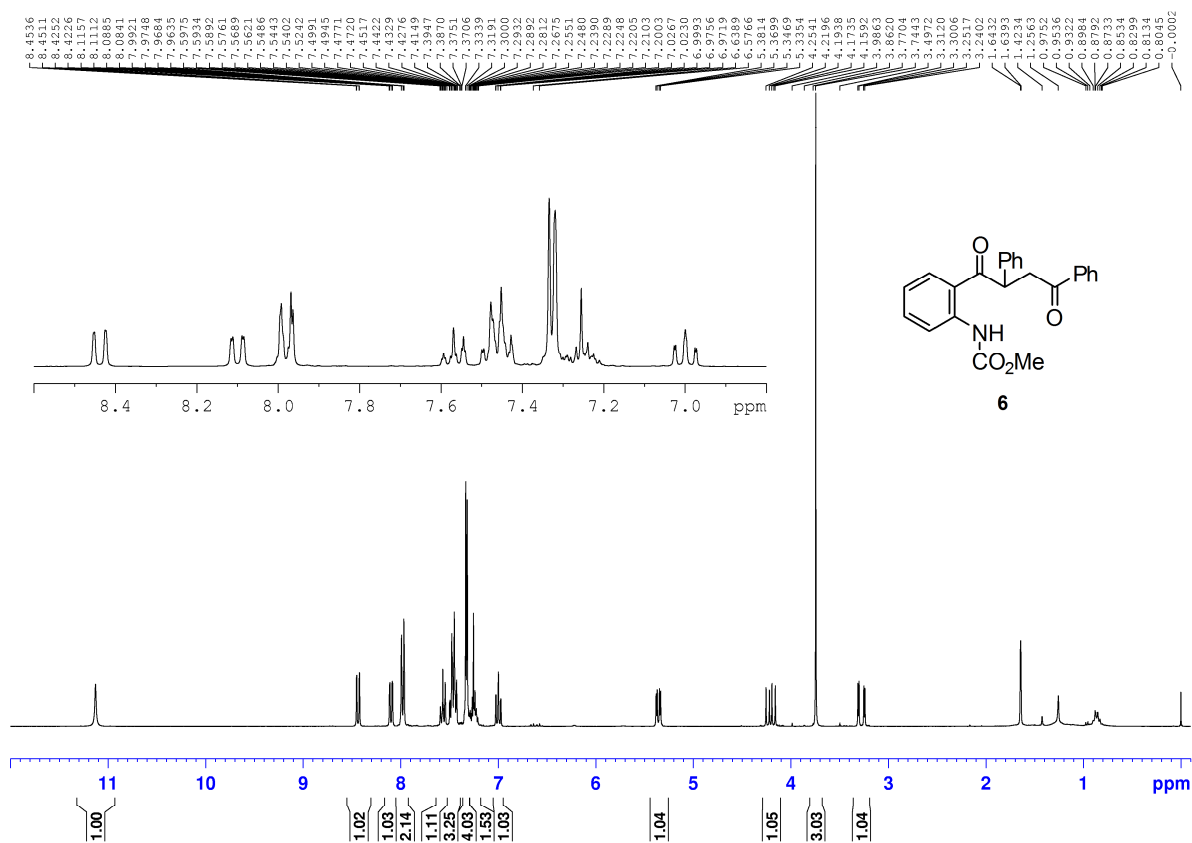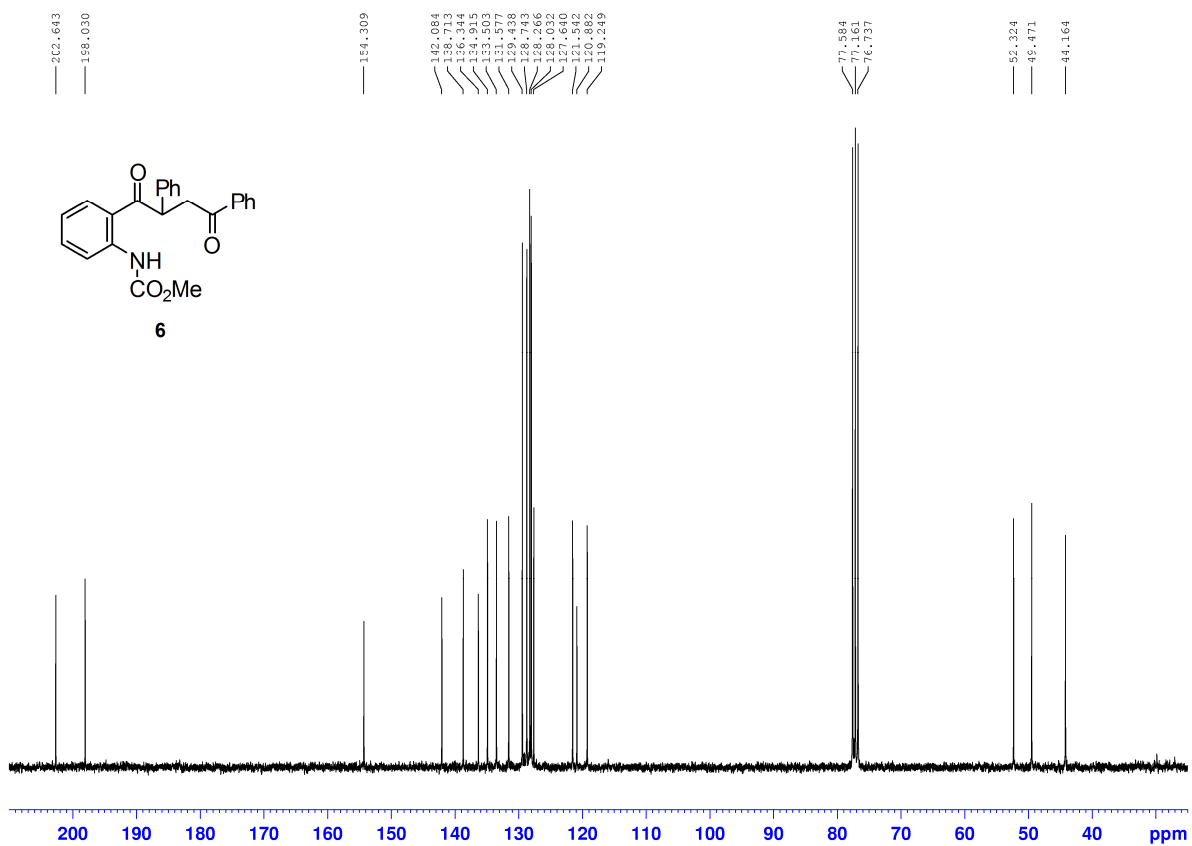

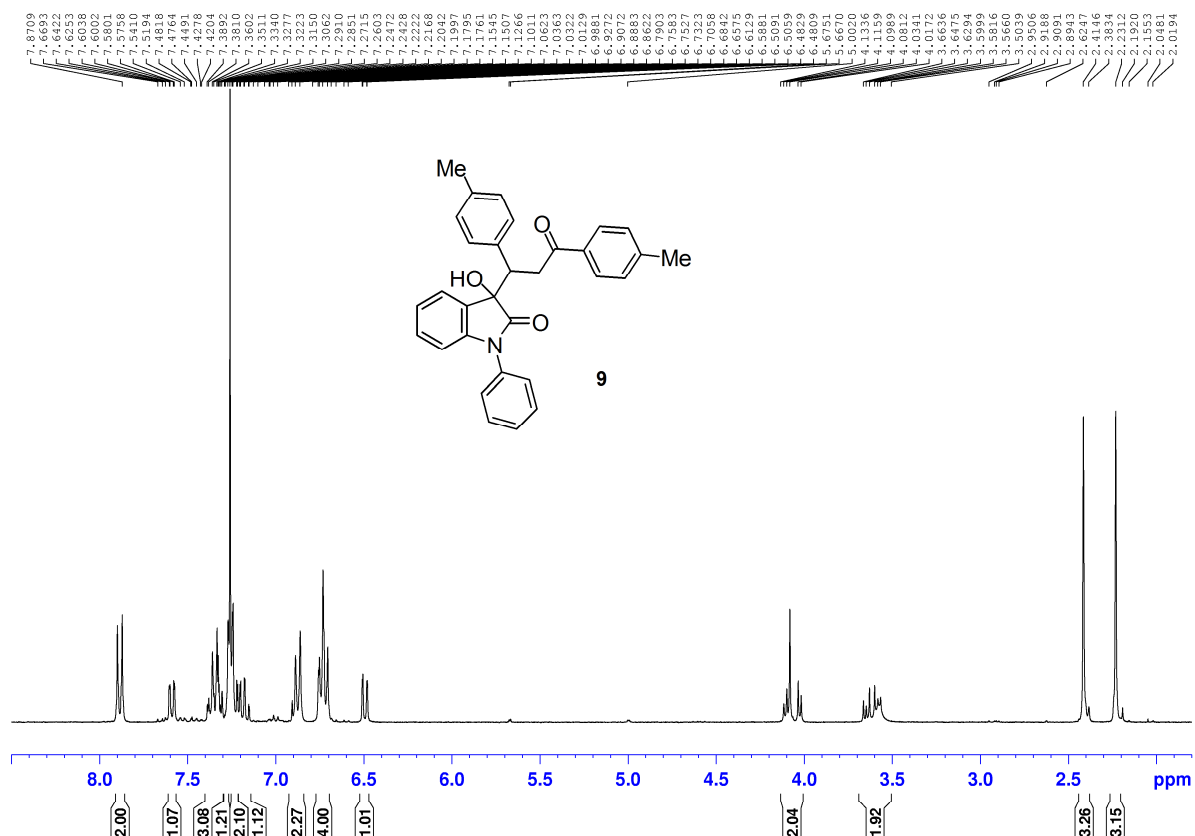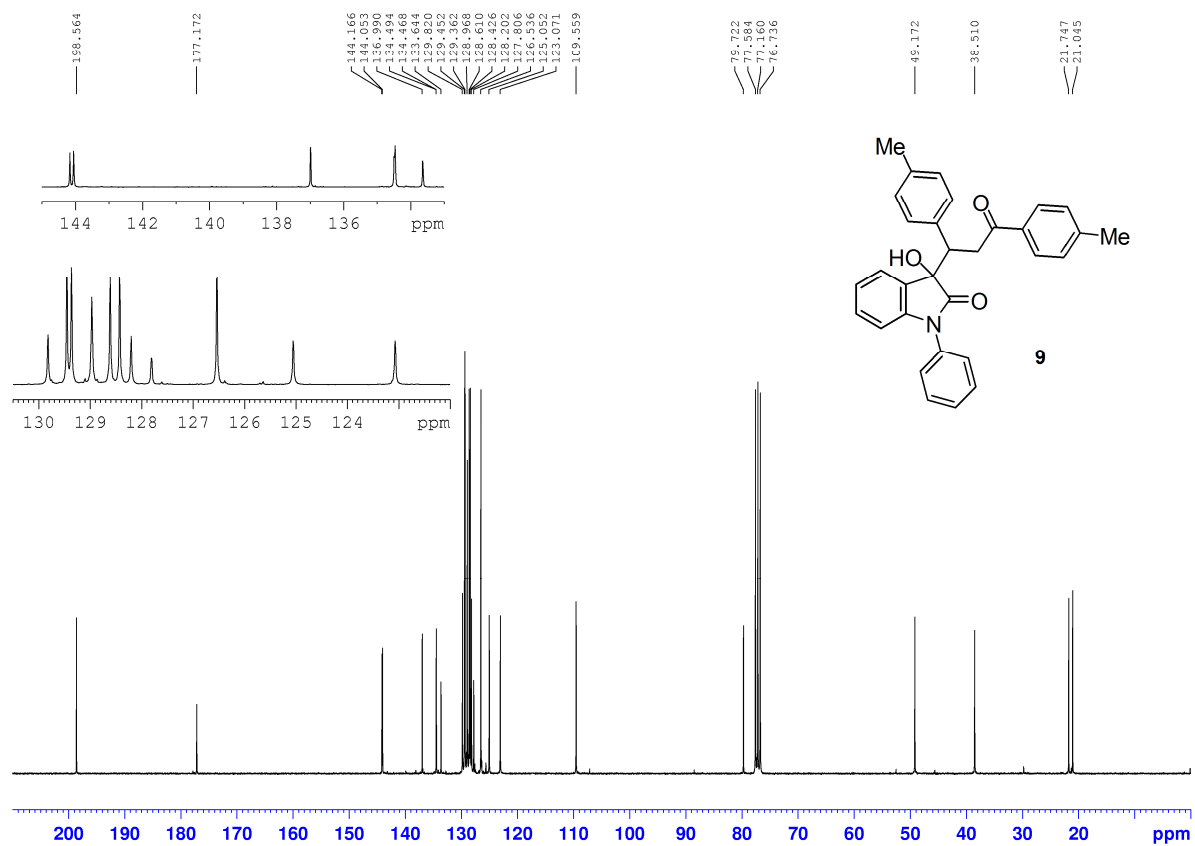

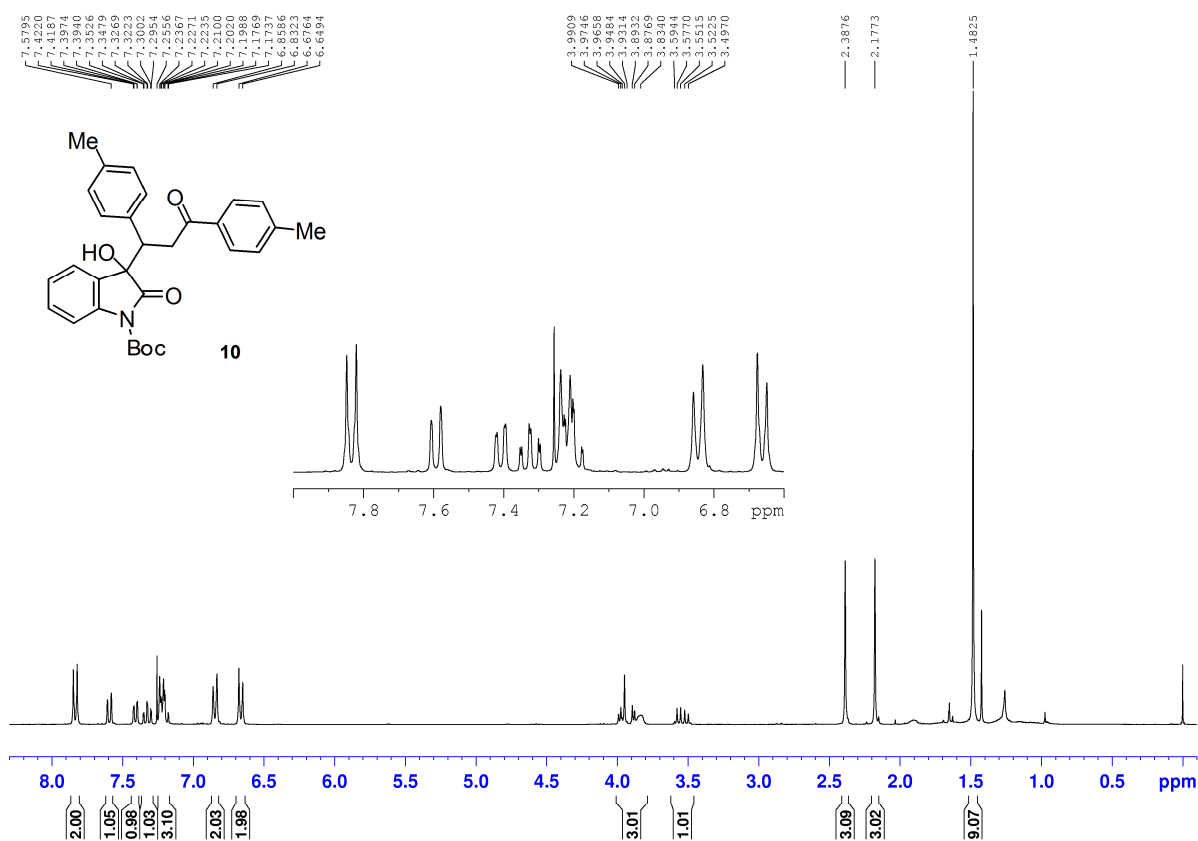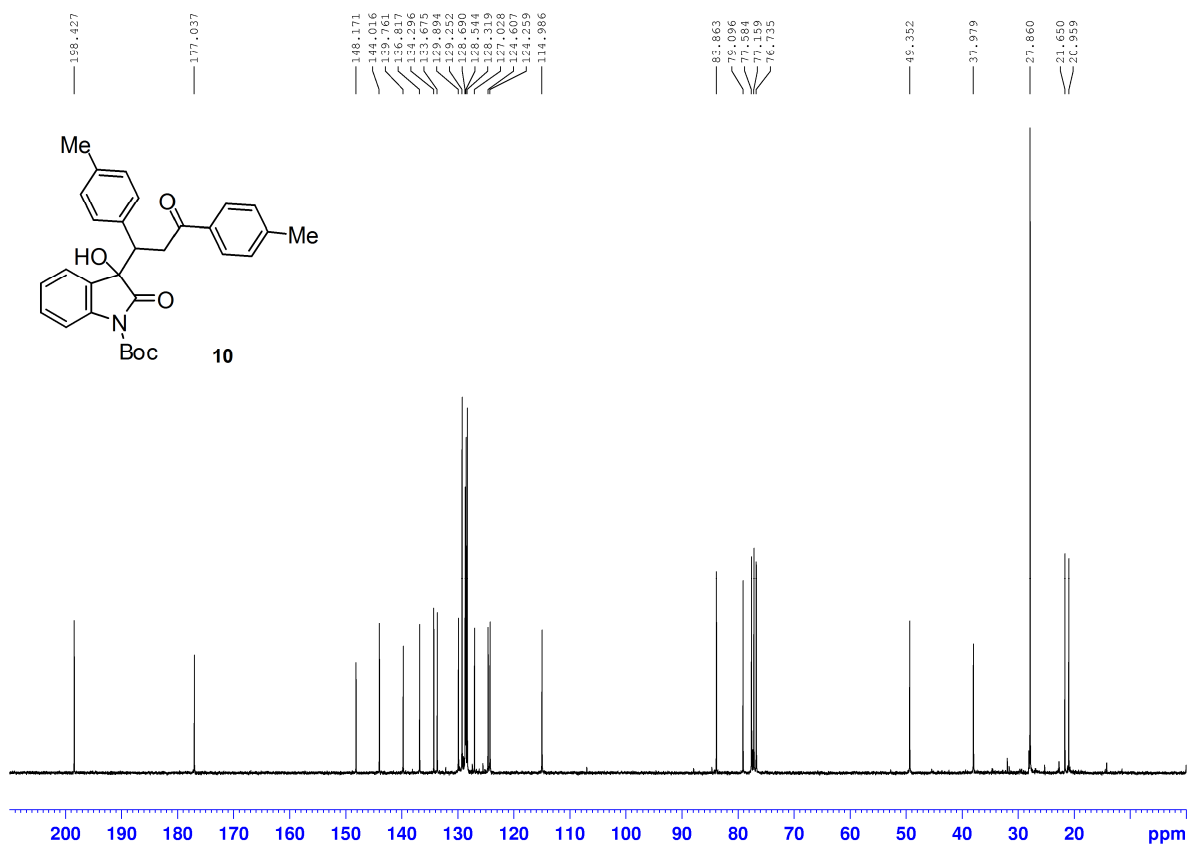

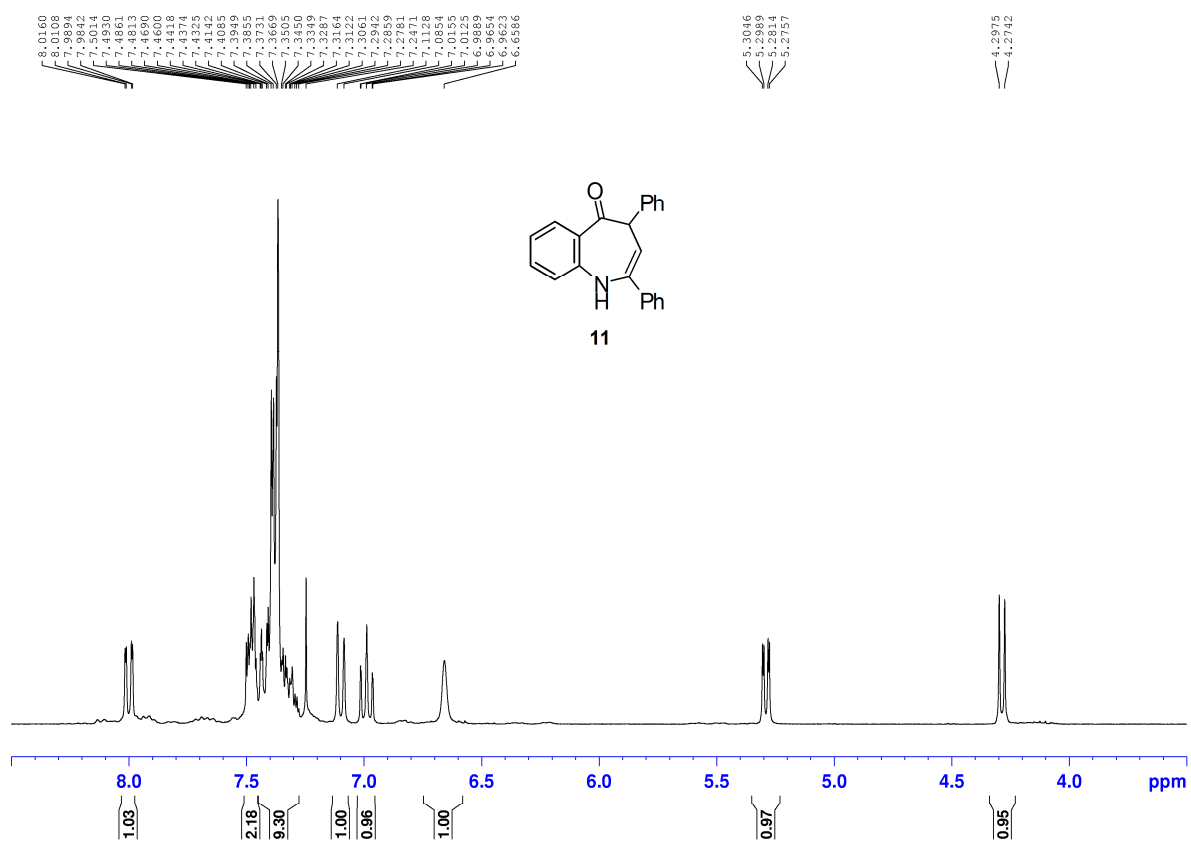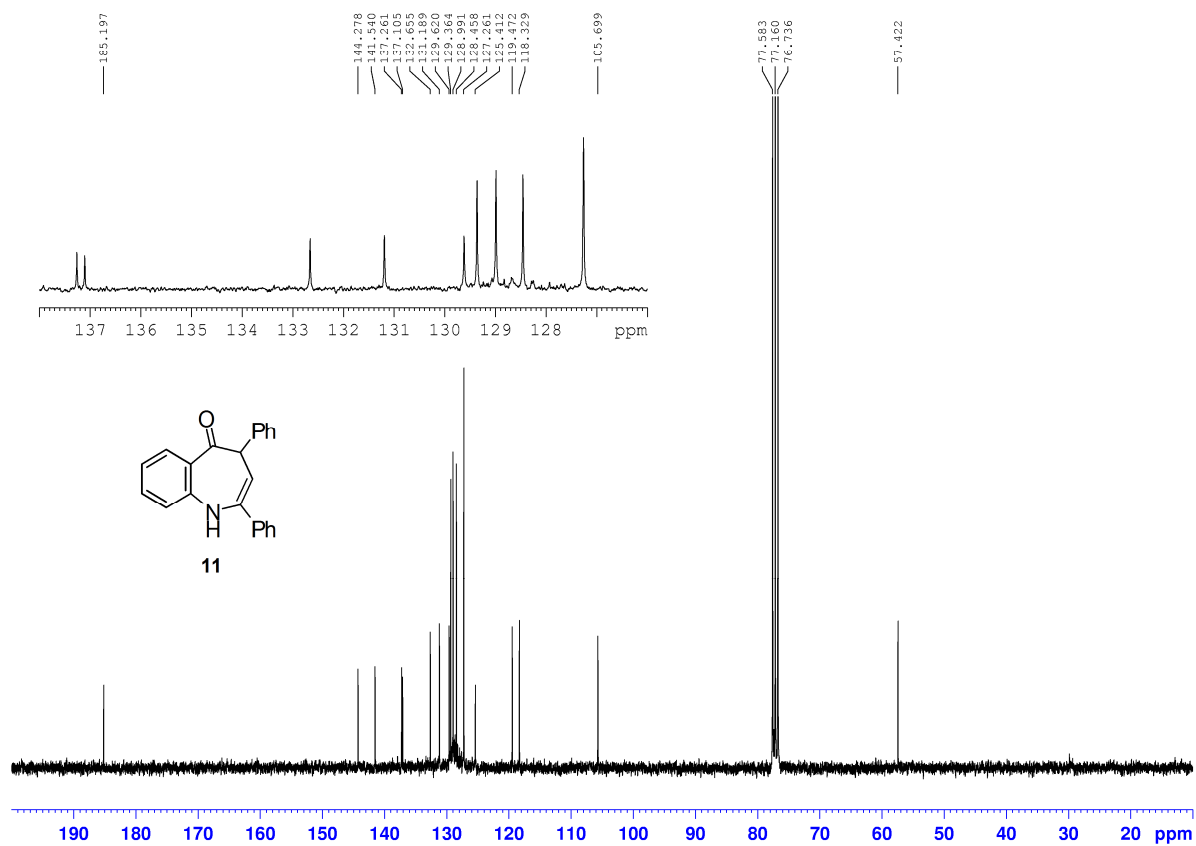

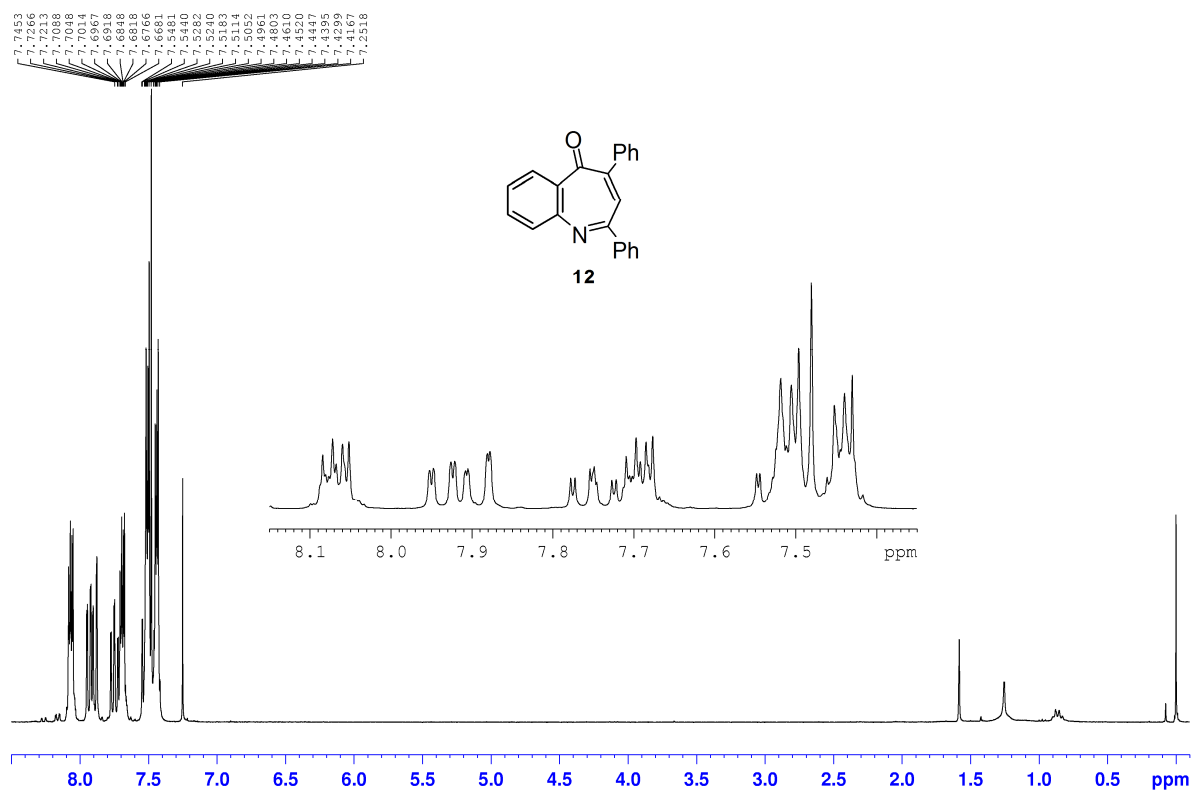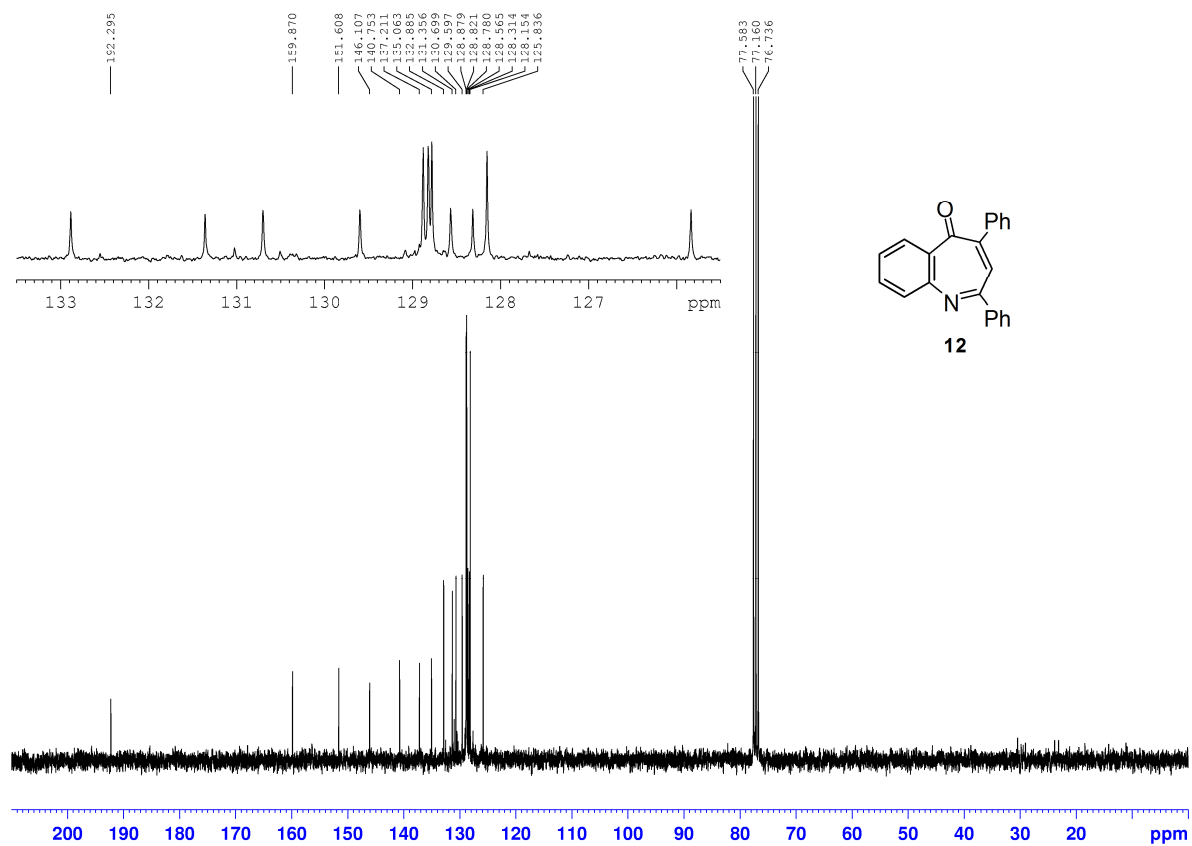

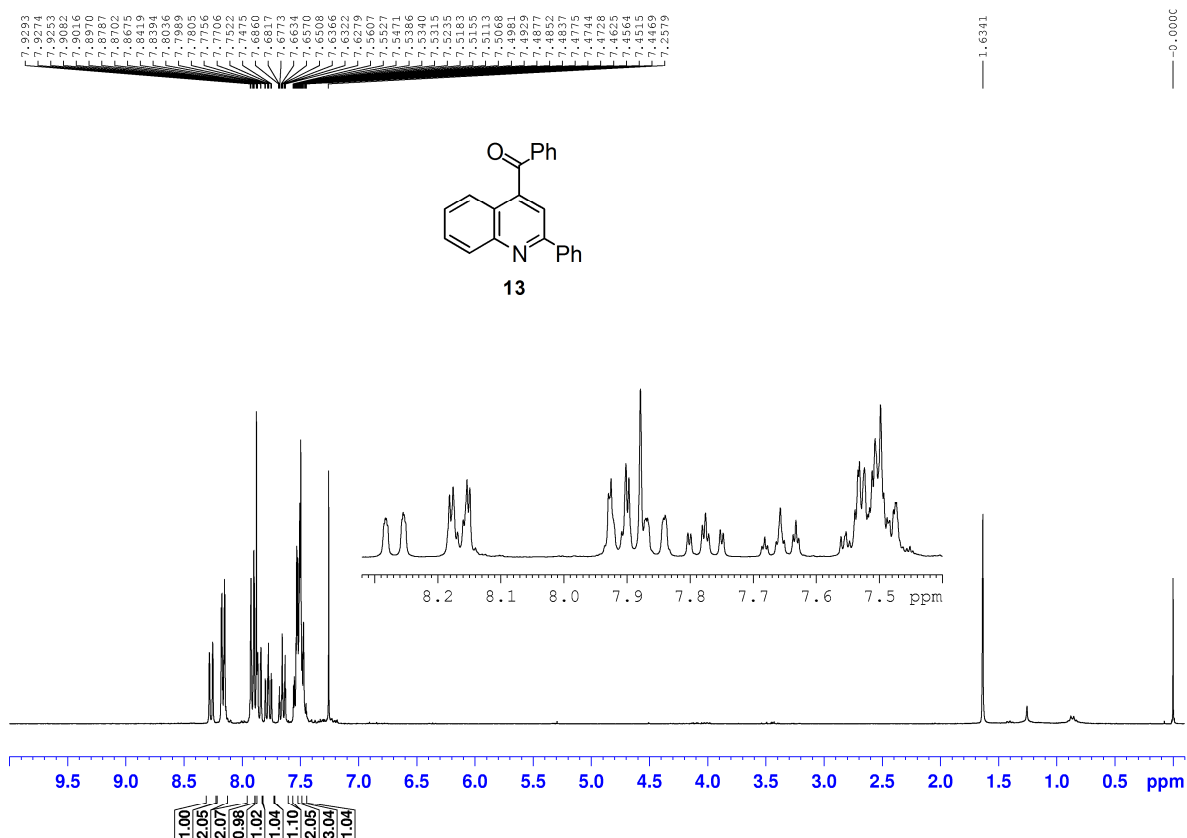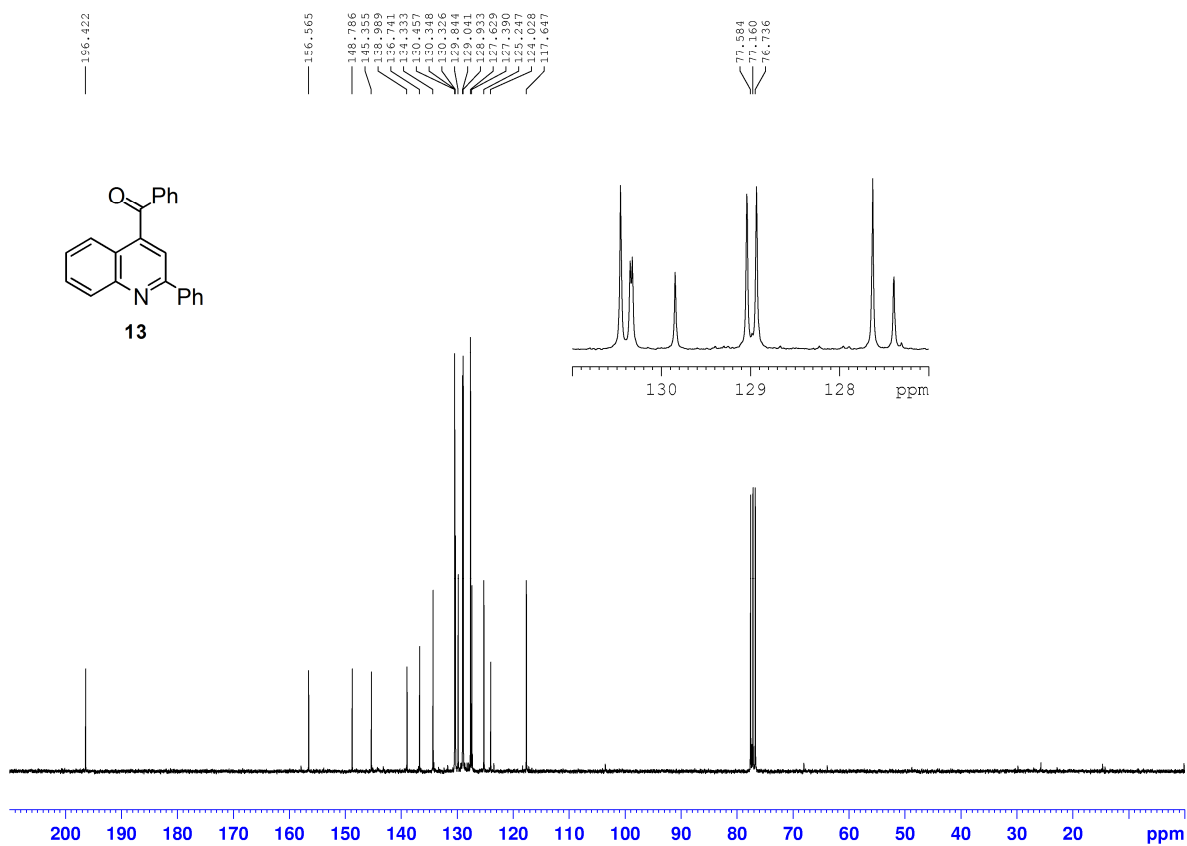



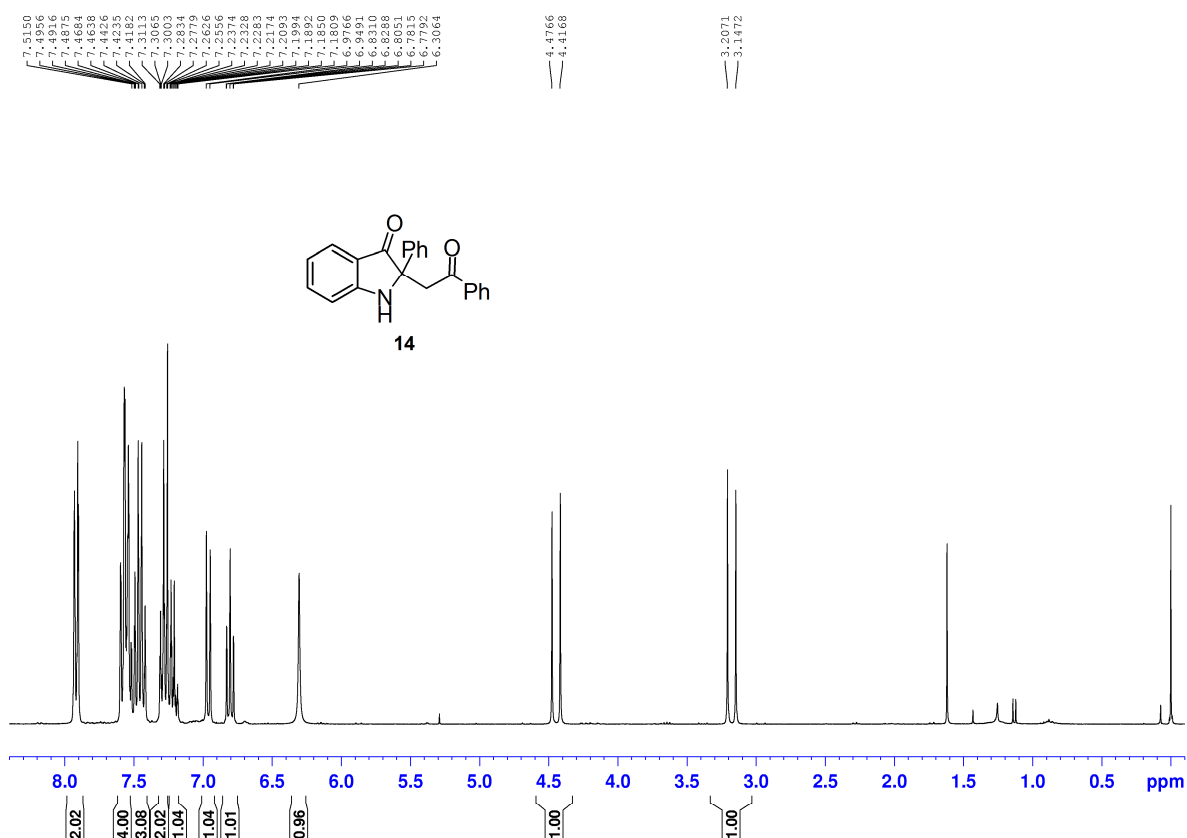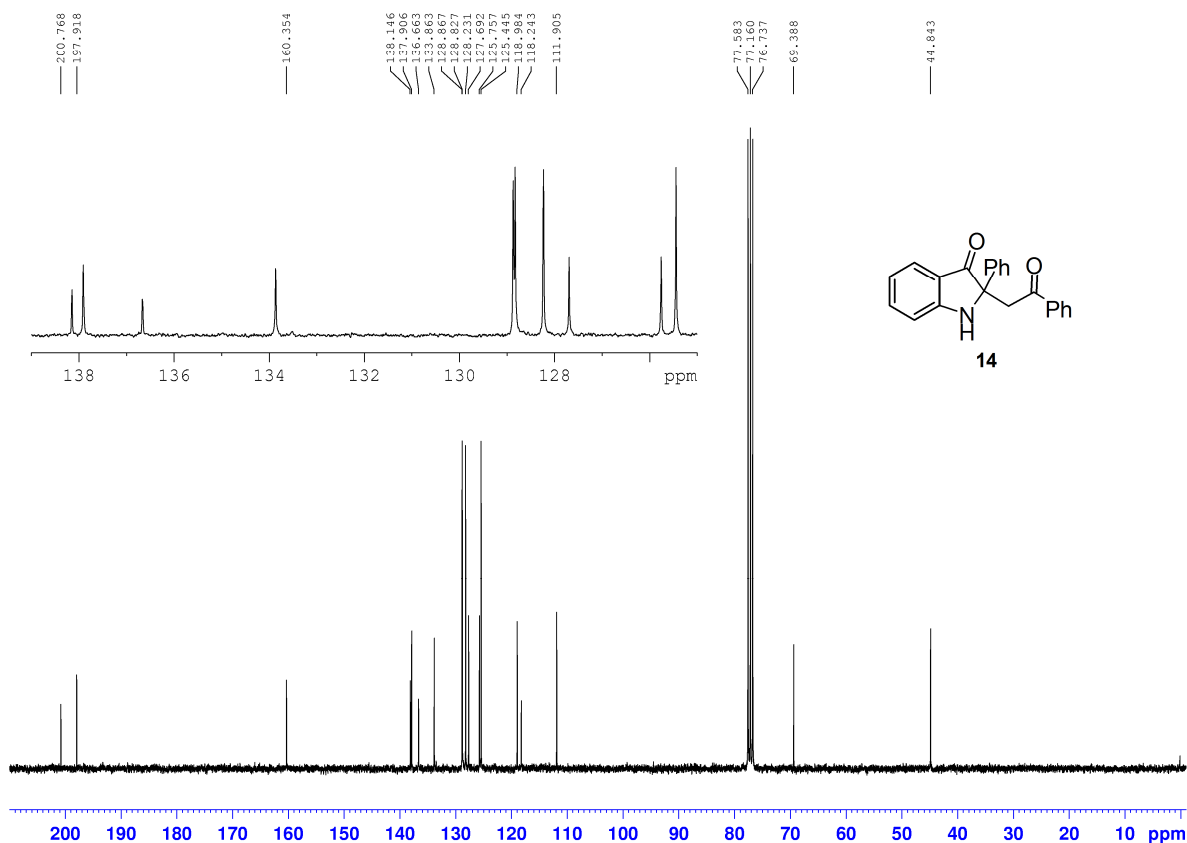

Supplement: Supplementary file 1 [file 3725782]
